# Supplementary material for: Comprehensive Analysis of Single Nucleotide Polymorphisms in Human MicroRNAs
Source: PLoS One. 2013 Nov 5;8(11):e78028. doi: 10.1371/journal.pone.0078028 (PMC3818353; doi:10.1371/journal.pone.0078028)
Supplement: Table S5 — Conservation analysis mature miRNAs. The information of the columns is given in the second sheet. (XLS) [file pone.0078028.s007.xls]

## Sheet: table7-mature_miRNA_conservatio
Table S5. Conservation analysis(mature miRNAs). The information of the columns is given in the second sheet.
MiRNA_family	Species	#Species	Human_miRNAs	Mature_miRNA_SNP_density
mir-124	mmu,cel,dme,hsa,cbr,rno,gga,dps,ame,aga,dre,ssc,ggo,age,ppa,ppy,ptr,mml,lla,fru,tni,xtr,bmo,bta,sme,mdo,oan,odi,cin,csa,cfa,tca,dan,der,dgr,dmo,dpe,dse,dsi,dvi,dwi,dya,bfl,cte,lgi,sko,spu,crm,ppc,dpu,isc,eca,bma,aae,cqu,tgu,api,nvi,sja,pma,xbo,egr,emu,asu,aca,ola	66	hsa-mir-124-1,hsa-mir-124-2,hsa-mir-124-3	3.55872
mir-9	cel,dme,mmu,hsa,cbr,rno,gga,dps,ame,aga,dre,ssc,ptr,ggo,lla,mne,age,fru,tni,xtr,bmo,sme,mdo,oan,mml,cfa,tca,dan,der,dgr,dmo,dpe,dse,dsi,dvi,dwi,dya,bta,cte,lgi,sko,spu,bfl,lmi,crm,ppc,dpu,isc,eca,bma,aae,cqu,tgu,api,nvi,ppy,ngi,nlo,pma,egr,emu,asu,aca,ola,sha	65	hsa-mir-9-1,hsa-mir-9-2,hsa-mir-9-3	0
let-7	cel,hsa,mmu,dme,cbr,rno,gga,dps,aga,dre,ssc,mml,ptr,ggo,ppy,age,ppa,fru,tni,bta,xtr,bmo,mdo,ame,oan,cin,csa,cfa,tca,dan,der,dgr,dmo,dpe,dse,dsi,dvi,dwi,dya,bfl,cte,lgi,sko,spu,sja,sma,crm,ppc,isc,eca,bma,aae,cqu,tgu,api,nvi,ngi,pma,egr,emu,asu,aca,ola,sha	64	hsa-let-7a-1,hsa-let-7a-2,hsa-let-7a-3,hsa-let-7b,hsa-let-7c,hsa-let-7d,hsa-let-7e,hsa-let-7f-1,hsa-let-7f-2,hsa-mir-98,hsa-let-7g,hsa-let-7i	0
mir-7	dme,hsa,rno,mmu,gga,dps,dre,ame,aga,ssc,ggo,ppy,sla,lla,mne,ppa,ptr,fru,tni,xtr,bmo,bta,mdo,oan,odi,cin,csa,mml,cfa,tca,dan,der,dgr,dmo,dpe,dse,dsi,dvi,dwi,dya,bfl,cte,lgi,sko,spu,dpu,isc,eca,bma,aae,cqu,tgu,api,nvi,nlo,cgr,pma,egr,emu,asu,aca,ola,sha	63	hsa-mir-7-1,hsa-mir-7-2,hsa-mir-7-3	0
mir-25	hsa,dme,mmu,rno,gga,dps,aga,dre,ggo,lca,age,ppa,ppy,ptr,mml,sla,lla,mne,fru,tni,xtr,bta,mdo,ame,oan,cin,csa,cfa,xla,tca,dan,der,dgr,dmo,dpe,dse,dsi,dvi,dwi,dya,bmo,bfl,cte,lgi,sko,spu,dpu,eca,ssc,bma,aae,cqu,tgu,nvi,ngi,nlo,pma,xbo,asu,aca,ola,sha	62	hsa-mir-25,hsa-mir-92a-1,hsa-mir-92a-2,hsa-mir-92b	12.012
mir-8	dme,mmu,hsa,rno,gga,dps,xla,ame,aga,cfa,dre,mml,ggo,ppy,ppa,fru,tni,xtr,bmo,bta,sme,mdo,oan,cin,csa,ptr,tca,dan,der,dgr,dmo,dpe,dse,dsi,dvi,dwi,dya,bfl,cte,lgi,sko,spu,lmi,dpu,isc,eca,bma,aae,cqu,tgu,api,nvi,sja,nlo,pma,egr,emu,ssc,asu,aca,ola,sha	62	hsa-mir-200b,hsa-mir-141,hsa-mir-200c,hsa-mir-200a,hsa-mir-429	0
mir-133	mmu,dme,hsa,rno,gga,dps,xla,ame,aga,dre,ggo,age,ppa,ppy,ptr,mml,sla,lla,mne,fru,tni,xtr,mdo,oan,cin,csa,bmo,tca,dan,der,dgr,dmo,dpe,dse,dsi,dvi,dwi,dya,bta,bfl,cte,lgi,sko,spu,cfa,ssc,dpu,isc,eca,bma,aae,cqu,tgu,nvi,ngi,nlo,pma,asu,aca,ola,sha	61	hsa-mir-133a-1,hsa-mir-133a-2,hsa-mir-133b	3.23625
mir-1	cel,dme,mmu,hsa,cbr,rno,gga,dps,ame,aga,dre,ppy,mne,ppa,fru,tni,xtr,bmo,mdo,oan,odi,mml,cfa,xla,ptr,tca,dan,der,dgr,dmo,dpe,dse,dsi,dvi,dwi,dya,bta,bfl,cte,lgi,sko,spu,ssc,crm,ppc,dpu,isc,eca,aae,cqu,tgu,api,nvi,cin,ngi,pma,egr,emu,asu,aca,ola	61	hsa-mir-1-2,hsa-mir-206,hsa-mir-1-1	0
mir-99	hsa,mmu,dme,rno,gga,dps,aga,dre,mml,ptr,ggo,ppy,lla,mne,ppa,age,sla,fru,tni,bta,xtr,mdo,ame,oan,ssc,cfa,tca,dan,der,dgr,dmo,dpe,dse,dsi,dvi,dwi,dya,bfl,cte,lgi,nve,sko,dpu,isc,bmo,eca,bma,aae,cqu,tgu,api,nvi,ngi,pma,asu,aca,ola,sha	58	hsa-mir-99a,hsa-mir-100,hsa-mir-99b	0
mir-10	dme,mmu,hsa,rno,gga,dps,dre,aga,ggo,ppy,sla,age,ppa,mne,fru,tni,xtr,bmo,bta,mdo,ame,oan,mml,cfa,ptr,tca,dan,der,dgr,dmo,dpe,dse,dsi,dvi,dwi,dya,bfl,cte,lgi,sko,spu,lmi,dpu,isc,eca,ssc,api,aae,cqu,nvi,tgu,nlo,pma,aca,ola,sha	56	hsa-mir-10a,hsa-mir-10b	0
mir-34	cel,hsa,dme,mmu,cbr,rno,gga,dps,dre,ggo,age,ppa,ppy,ptr,mml,sla,lla,mne,bta,xtr,bmo,mdo,ame,aga,oan,cin,csa,cfa,ssc,tca,dan,der,dgr,dmo,dpe,dse,dsi,dvi,dwi,dya,bfl,cte,lgi,spu,crm,dpu,eca,bma,aae,tgu,api,nvi,ngi,nlo,asu,aca	56	hsa-mir-34a,hsa-mir-34b,hsa-mir-34c	3.69004
mir-125	mmu,dme,hsa,rno,gga,dps,ame,aga,dre,ssc,ggo,age,ppa,ppy,ptr,mml,sla,lla,mne,lca,fru,tni,bta,xtr,mdo,oan,cfa,tca,dan,der,dgr,dmo,dpe,dse,dsi,dvi,dwi,dya,bfl,cte,sko,spu,eca,aae,cqu,tgu,nvi,nlo,pma,egr,emu,aca,ola,sha	54	hsa-mir-125b-1,hsa-mir-125a,hsa-mir-125b-2	7.60456
mir-29	hsa,mmu,dme,rno,gga,dps,dre,ssc,ggo,age,ppa,ppy,ptr,mml,sla,lla,mne,fru,tni,bta,xtr,mdo,ame,oan,cfa,dan,der,dgr,dmo,dse,dsi,dvi,dwi,dya,bmo,bfl,cte,lgi,sko,spu,dpu,isc,eca,aae,cqu,tgu,api,nvi,tca,ngi,pma,aca,ola	53	hsa-mir-29a,hsa-mir-29b-1,hsa-mir-29b-2,hsa-mir-29c	0
mir-31	hsa,dme,mmu,rno,gga,dps,mml,ptr,ggo,ppy,mne,ppa,dre,bta,xtr,sme,mdo,bmo,ame,oan,cin,csa,cfa,tca,dan,der,dgr,dmo,dpe,dse,dsi,dvi,dwi,dya,bfl,cte,lgi,sko,spu,crm,ppc,dpu,eca,bma,aae,cqu,tgu,nvi,ngi,nlo,asu,aca,ola	53	hsa-mir-31	0
mir-219	hsa,dme,mmu,rno,gga,dps,dre,ame,aga,mml,ggo,ppy,fru,tni,xtr,mdo,oan,cin,csa,cfa,ptr,tca,dan,der,dgr,dmo,dpe,dse,dsi,dvi,dwi,dya,bta,cte,spu,bfl,dpu,isc,eca,aae,tgu,api,nvi,ngi,nlo,xbo,egr,emu,ssc,aca,sko	51	hsa-mir-219-1,hsa-mir-219-2	0
mir-216	hsa,dme,mmu,rno,gga,dps,dre,aga,ssc,lca,ptr,ggo,ppy,ppa,fru,tni,xtr,bmo,mdo,ame,oan,cin,csa,mml,cfa,tca,dan,der,dgr,dmo,dpe,dse,dsi,dvi,dwi,dya,bta,bfl,cte,lgi,dpu,eca,aae,cqu,tgu,nvi,ngi,pma,aca,sha	50	hsa-mir-216a,hsa-mir-216b	0
mir-184	mmu,dme,hsa,rno,gga,dps,ame,aga,dre,ssc,ptr,ppy,mne,fru,tni,xtr,mdo,oan,mml,bmo,tca,dan,der,dgr,dmo,dpe,dse,dsi,dvi,dwi,dya,bta,bfl,cte,lgi,sko,spu,cfa,isc,eca,api,aae,cqu,tgu,nvi,ngi,nlo,pma,aca,ola	50	hsa-mir-184	0
mir-33	hsa,dme,mmu,rno,gga,dps,mml,ptr,ggo,ppy,mne,ppa,xtr,ame,oan,cin,cfa,tca,dan,der,dgr,dmo,dpe,dse,dsi,dvi,dwi,dya,bta,bfl,cte,lgi,sko,spu,dpu,bmo,mdo,eca,aae,cqu,tgu,nvi,pma,aca,ola	45	hsa-mir-33a,hsa-mir-33b	6.06061
mir-137	mmu,hsa,rno,gga,dre,fru,tni,xtr,mdo,ame,dme,oan,mml,cfa,ptr,tca,bta,bmo,bfl,cte,lgi,sko,spu,aga,ppc,dps,dsi,dpu,isc,eca,bma,api,aae,cqu,tgu,nvi,ppy,ngi,nlo,pma,xbo,asu,aca,ola	44	hsa-mir-137	0
mir-190	mmu,hsa,rno,gga,dre,mml,ptr,ggo,ppa,fru,tni,ame,dme,oan,tca,bta,bmo,bfl,cte,lgi,sko,cfa,aga,dps,dsi,mdo,eca,api,aae,cqu,tgu,nvi,ppy,pma,egr,emu,ssc,aca,ola,sha	40	hsa-mir-190a,hsa-mir-190b	0
mir-210	hsa,dme,mmu,rno,dps,dre,ame,aga,fru,tni,xtr,bta,mml,ssc,bmo,ptr,tca,dan,der,dgr,dmo,dpe,dse,dsi,dvi,dwi,dya,cfa,lmi,mdo,aae,cqu,api,nvi,ppy,ngi,aca,ola	38	hsa-mir-210	0
MIR156	ath,osa,zma,sbi,mtr,sof,gma,ptc,ppt,ghr,gra,bna,pta,smo,vvi,sly,bra,bol,bdi,aqc,ctr,rco,aly,ahy,hvu,tae,far,csi,bgy,bcy,tcc,ssp,ssl,vun	34	NA	NaN
mir-46	cel,dme,cbr,dps,ame,aga,odi,bmo,tca,dan,der,dgr,dmo,dpe,dse,dsi,dvi,dwi,dya,bfl,lgi,sko,lmi,crm,ppc,dpu,bma,api,aae,cqu,nvi,ngi,nlo,asu	34	NA	NaN
mir-2	cel,dme,dps,ame,aga,sme,bmo,tca,dan,der,dgr,dmo,dpe,dse,dsi,dvi,dwi,dya,cte,lgi,crm,dpu,isc,bma,aae,cqu,api,nvi,ngi,nlo,egr,emu,asu	33	NA	NaN
mir-153	mmu,hsa,rno,gga,dre,ssc,mml,ppy,mne,ggo,fru,tni,xtr,oan,cin,csa,ptr,bta,cte,lgi,sko,spu,cfa,dpu,isc,mdo,eca,bma,tgu,pma,egr,emu,aca	33	hsa-mir-153-1,hsa-mir-153-2	0
mir-375	hsa,mmu,dre,fru,tni,gga,mdo,ame,dme,rno,xtr,mml,aga,ptr,bta,bfl,cte,spu,lgi,sko,cfa,dps,dsi,isc,aae,cqu,tgu,nvi,ppy,tca,ngi,pma,aca	33	hsa-mir-375	0
mir-87	cel,dme,cbr,dps,sme,ame,aga,bmo,tca,dan,der,dgr,dmo,dpe,dse,dsi,dvi,dwi,dya,cte,lgi,crm,ppc,isc,bma,aae,cqu,api,egr,emu,asu	31	NA	NaN
mir-17	hsa,mmu,rno,gga,xla,dre,ssc,ggo,lca,age,ppa,ppy,ptr,mml,sla,lla,mne,fru,tni,bta,xtr,mdo,oan,cfa,eca,tgu,pma,aca,ola,sha	30	hsa-mir-17,hsa-mir-18a,hsa-mir-20a,hsa-mir-93,hsa-mir-106a,hsa-mir-106b,hsa-mir-18b,hsa-mir-20b	0
mir-15	hsa,mmu,rno,gga,dre,ssc,ggo,age,ppa,ppy,ptr,mml,lla,mne,sla,lca,fru,tni,bta,xtr,mdo,oan,cfa,xla,eca,tgu,pma,aca,meu,ola	30	hsa-mir-15a,hsa-mir-16-1,hsa-mir-16-2,hsa-mir-15b,hsa-mir-195	2.28311
MIR159	ath,osa,sbi,mtr,sof,gma,zma,ptc,ppt,pta,smo,tae,bna,vvi,sly,bra,pvu,aqc,ctr,rco,aly,ahy,hvu,far,csi,bdi,ssp,aau,amg,vun	30	NA	NaN
mir-19	hsa,mmu,rno,gga,xla,dre,ssc,ggo,lca,age,ppa,ppy,ptr,mml,sla,lla,mne,fru,tni,xtr,mdo,bta,oan,cfa,eca,tgu,pma,aca,ola,sha	30	hsa-mir-19a,hsa-mir-19b-1,hsa-mir-19b-2	3.77358
mir-23	hsa,mmu,rno,gga,dre,ssc,ptr,ppy,ppa,ggo,age,lca,mml,sla,mne,fru,tni,xtr,bta,mdo,oan,cfa,xla,eca,tgu,pma,aca,ola,sha	29	hsa-mir-23a,hsa-mir-23b	0
MIR396	ath,osa,sbi,sof,gma,zma,ptc,mtr,ghr,bna,pta,smo,vvi,lja,aqc,ccl,rco,aly,pab,far,csi,bgy,bcy,tcc,bdi,ssp,aau,amg,ssl	29	NA	NaN
mir-67	cel,dme,cbr,dps,aga,bmo,sme,tca,dan,der,dgr,dmo,dpe,dse,dsi,dvi,dwi,dya,lgi,cte,lmi,crm,dpu,isc,aae,api,nvi,ame,asu	29	NA	NaN
mir-218	hsa,mmu,rno,gga,dre,ggo,age,ppa,lca,ppy,ptr,sla,lla,mne,mml,fru,tni,xtr,bta,mdo,oan,cfa,eca,tgu,ssc,pma,aca,ola	28	hsa-mir-218-1,hsa-mir-218-2	4.54545
mir-27	hsa,mmu,rno,gga,dre,ssc,ggo,age,ppa,lca,ppy,ptr,mml,sla,mne,fru,tni,bta,xtr,mdo,oan,cfa,eca,tgu,pma,aca,ola,sha	28	hsa-mir-27a,hsa-mir-27b	5.71429
mir-205	mmu,hsa,rno,gga,dre,ssc,ggo,age,ppa,ptr,lla,mne,fru,tni,bta,xtr,oan,mml,xla,cfa,mdo,eca,tgu,ppy,pma,aca,ola,sha	28	hsa-mir-205	0
mir-30	hsa,mmu,rno,gga,dre,ssc,mml,ptr,ggo,lla,mne,age,ppa,ppy,fru,tni,bta,xtr,mdo,oan,cfa,eca,tgu,pma,aca,ola,sha	27	hsa-mir-30a,hsa-mir-30c-2,hsa-mir-30d,hsa-mir-30b,hsa-mir-30c-1,hsa-mir-30e	8.29876
mir-181	mmu,hsa,rno,gga,dre,ssc,ggo,ppa,ptr,mml,sla,mne,ppy,lla,fru,tni,bta,xtr,mdo,oan,cfa,eca,tgu,pma,aca,ola,sha	27	hsa-mir-181a-2,hsa-mir-181b-1,hsa-mir-181c,hsa-mir-181a-1,hsa-mir-181b-2,hsa-mir-181d	0
mir-135	mmu,hsa,rno,gga,dre,ssc,lla,age,ppa,mml,ptr,ggo,ppy,fru,tni,xtr,mdo,oan,cfa,bta,bfl,eca,tgu,pma,aca,ola,sha	27	hsa-mir-135a-1,hsa-mir-135a-2,hsa-mir-135b	0
MIR171_1	ath,osa,zma,sbi,mtr,ptc,ppt,bna,smo,tae,vvi,gma,sly,bra,bol,bdi,aqc,ccl,ctr,crt,rco,aly,hvu,far,csi,tcc,ssl	27	NA	NaN
mir-199	mmu,hsa,rno,gga,dre,ggo,ppa,ppy,ptr,mml,sla,lla,mne,fru,tni,bta,xtr,mdo,oan,cfa,ssc,eca,tgu,pma,aca,ola,sha	27	hsa-mir-199a-1,hsa-mir-199a-2,hsa-mir-199b	3.43643
mir-101	hsa,mmu,rno,gga,dre,ggo,sla,age,ppa,ppy,ptr,mml,lla,mne,fru,tni,bta,xtr,mdo,oan,cfa,ssc,eca,tgu,aca,ola,sha	27	hsa-mir-101-1,hsa-mir-101-2	0
mir-183	mmu,hsa,rno,gga,dre,ssc,mml,ptr,ggo,sla,mne,ppa,fru,tni,xtr,mdo,oan,cin,csa,cfa,bta,bfl,lgi,eca,ppy,pma,ola	27	hsa-mir-183	0
mir-315	dme,dps,ame,aga,dan,der,dgr,dmo,dpe,dse,dsi,dvi,dwi,dya,cte,lgi,sko,tca,sme,dpu,isc,aae,cqu,api,nvi,nlo,pma	27	NA	NaN
mir-279	dme,dps,aga,bmo,ame,tca,dan,der,dgr,dmo,dpe,dse,dsi,dvi,dwi,dya,cte,lgi,dpu,isc,aae,cqu,api,nvi,asu,bma,ppc	27	NA	NaN
MIR166	ath,osa,zma,sbi,mtr,gma,ptc,ghr,ppt,pta,smo,bna,vvi,sly,pvu,bdi,aqc,csi,ctr,crt,rco,aly,pab,hvu,tcc,ssl	26	NA	NaN
mir-103	hsa,mmu,rno,gga,dre,ssc,age,ggo,ppa,ppy,ptr,mml,lla,mne,fru,tni,bta,xtr,mdo,oan,cfa,eca,tgu,pma,aca,ola	26	hsa-mir-103a-2,hsa-mir-103a-1,hsa-mir-107,hsa-mir-103b-1,hsa-mir-103b-2	0
mir-24	hsa,mmu,rno,gga,dre,ssc,mml,ppy,mne,ppa,ggo,ptr,fru,tni,xtr,bta,mdo,oan,cfa,xla,eca,tgu,pma,aca,ola,sha	26	hsa-mir-24-1,hsa-mir-24-2	0
mir-204	mmu,hsa,rno,gga,dre,ssc,ptr,ggo,ppy,sla,mne,ppa,mml,tni,fru,xtr,mdo,bta,oan,cfa,eca,tgu,pma,aca,ola,sha	26	hsa-mir-204,hsa-mir-211	9.09091
mir-26	hsa,mmu,rno,gga,dre,ssc,ptr,ggo,ppy,lla,mne,mml,ppa,fru,tni,bta,xtr,oan,cfa,mdo,eca,tgu,pma,aca,ola,sha	26	hsa-mir-26a-1,hsa-mir-26b,hsa-mir-26a-2	4.20168
mir-22	hsa,mmu,rno,dre,age,ppa,lca,mml,ppy,ptr,sla,lla,mne,fru,tni,xtr,bta,mdo,oan,gga,cfa,eca,ssc,pma,aca,ola	26	hsa-mir-22	0
bantam	dme,dps,ame,aga,sme,bmo,dan,der,dgr,dmo,dpe,dse,dsi,dvi,dwi,dya,cte,tca,sja,ppc,dpu,isc,api,aae,cqu,nvi	26	NA	NaN
MIR160	ath,osa,zma,sbi,mtr,gma,ptc,ppt,smo,tae,vvi,sly,bra,aqc,csi,rco,aly,ahy,pab,ttu,far,tcc,bdi,aau,vun	25	NA	NaN
mir-130	mmu,hsa,rno,gga,dre,ssc,mml,ggo,mne,ppa,fru,tni,xtr,mdo,oan,cfa,ptr,bta,eca,tgu,ppy,pma,aca,ola,sha	25	hsa-mir-130a,hsa-mir-301a,hsa-mir-130b,hsa-mir-301b	2.98507
mir-128	mmu,hsa,rno,gga,dre,ssc,mml,ptr,ppy,sla,age,ppa,fru,tni,bta,xtr,mdo,oan,cfa,eca,tgu,pma,aca,ola,sha	25	hsa-mir-128-1,hsa-mir-128-2	0
mir-221	hsa,mmu,rno,gga,dre,mml,ggo,ppy,ppa,age,fru,tni,bta,xtr,mdo,oan,cfa,ssc,ptr,eca,tgu,pma,aca,ola,sha	25	hsa-mir-221,hsa-mir-222	4.54545
mir-21	hsa,mmu,rno,dre,ssc,mml,ptr,ggo,ppy,mne,age,ppa,fru,tni,bta,gga,mdo,cgr,oan,cfa,eca,tgu,aca,ola,sha	25	hsa-mir-21	0
mir-214	hsa,mmu,rno,dre,ssc,ggo,age,ppa,ppy,ptr,mml,sla,mne,fru,tni,xtr,bta,mdo,oan,gga,cfa,eca,tgu,aca,ola	25	hsa-mir-214,hsa-mir-3120	0
mir-71	cel,cbr,sme,bmo,ame,tca,bfl,cte,lgi,sko,spu,sja,sma,crm,ppc,dpu,isc,bma,aae,cqu,api,nvi,egr,emu,asu	25	NA	NaN
mir-196	hsa,mmu,rno,gga,dre,ssc,mml,ggo,ppy,ptr,lla,age,ppa,fru,tni,xtr,mdo,oan,cfa,bta,eca,pma,aca,ola	24	hsa-mir-196a-1,hsa-mir-196a-2,hsa-mir-196b	11.3636
mir-194	mmu,hsa,rno,gga,dre,mml,ptr,ppy,ggo,mne,age,fru,tni,xtr,oan,cfa,xla,bta,eca,tgu,ssc,pma,aca,ola	24	hsa-mir-194-1,hsa-mir-194-2	0
mir-193	mmu,hsa,rno,dre,fru,tni,gga,xtr,bta,mdo,dme,oan,mml,cfa,ptr,dps,dsi,eca,ssc,tgu,ppy,aca,ola,sha	24	hsa-mir-193a,hsa-mir-193b	0
mir-263	dme,dps,ame,aga,bmo,tca,dan,der,dgr,dmo,dpe,dse,dsi,dvi,dwi,dya,dpu,isc,aae,cqu,api,nvi,ngi,nlo	24	NA	NaN
mir-276	dme,dps,ame,aga,bmo,tca,dan,der,dgr,dmo,dpe,dse,dsi,dvi,dwi,dya,lmi,dpu,api,aae,cqu,nvi,ngi,nlo	24	NA	NaN
mir-275	dme,dps,aga,bmo,ame,tca,dan,der,dgr,dmo,dpe,dse,dsi,dvi,dwi,dya,dpu,isc,aae,cqu,api,nvi,ngi,nlo	24	NA	NaN
mir-252	cel,cbr,dme,bfl,cte,lgi,sko,spu,ame,bmo,crm,ppc,dps,dsi,dpu,isc,aae,cqu,api,nvi,tca,ngi,nlo,asu	24	NA	NaN
MIR167_1	ath,osa,zma,sbi,gma,ptc,mtr,tae,bna,vvi,sly,lja,bra,bdi,ccl,ctr,rco,ghr,aly,ahy,gso,csi,tcc	23	NA	NaN
mir-192	hsa,mmu,rno,gga,dre,mml,ptr,ppy,ggo,mne,fru,tni,xtr,bta,oan,cfa,ssc,mdo,eca,tgu,pma,aca,ola	23	hsa-mir-192,hsa-mir-215	4.54545
mir-223	hsa,mmu,rno,gga,dre,mml,ptr,ggo,ppy,sla,ppa,fru,tni,xtr,mdo,oan,xla,bta,cfa,eca,tgu,aca,ola	23	hsa-mir-223	0
mir-217	hsa,mmu,rno,gga,dre,ssc,ggo,ppa,fru,tni,xtr,mdo,oan,mml,ptr,bta,bfl,cfa,eca,tgu,ppy,pma,aca	23	hsa-mir-217	9.09091
mir-126	mmu,hsa,rno,gga,dre,fru,tni,bta,xtr,oan,cin,csa,mml,cfa,ptr,mdo,eca,tgu,ppy,ssc,aca,ola,sha	23	hsa-mir-126	0
mir-iab-4	dme,dps,ame,aga,tca,dan,der,dgr,dmo,dpe,dse,dsi,dvi,dwi,dya,bmo,dpu,api,aae,cqu,nvi,isc,ngi	23	NA	NaN
MIR172	ath,osa,zma,sbi,gma,ptc,mtr,vvi,sly,bra,bol,aqc,csi,rco,ghr,aly,ata,tcc,bdi,aau,ssl,vun	22	NA	NaN
mir-96	hsa,mmu,rno,dre,mml,ptr,ggo,sla,mne,ppa,fru,tni,xtr,mdo,oan,bta,bfl,cfa,isc,eca,ppy,pma	22	hsa-mir-96	0
mir-187	mmu,hsa,rno,gga,dre,ggo,ppy,mne,ppa,fru,tni,xtr,mdo,oan,mml,bta,cfa,eca,tgu,ssc,aca,ola	22	hsa-mir-187	0
mir-142	mmu,hsa,rno,gga,dre,fru,tni,xtr,bta,mdo,oan,mml,cfa,xla,ptr,eca,ssc,tgu,ppy,aca,ola,sha	22	hsa-mir-142	0
mir-140	mmu,hsa,rno,gga,dre,ssc,ptr,mne,fru,tni,xtr,bta,oan,mml,cfa,mdo,eca,tgu,ppy,aca,ola,sha	22	hsa-mir-140	10
mir-144	mmu,hsa,rno,dre,ptr,ppy,mne,ppa,fru,tni,xtr,gga,mdo,oan,mml,cfa,bta,eca,tgu,pma,aca,ola	22	hsa-mir-144	0
mir-317	dme,dps,ame,aga,bmo,tca,dan,der,dgr,dmo,dpe,dse,dsi,dvi,dwi,dya,dpu,isc,aae,cqu,nvi,ngi	22	NA	NaN
mir-277	dme,dps,ame,aga,bmo,tca,dan,der,dgr,dmo,dpe,dse,dsi,dvi,dwi,dya,aae,cqu,api,nvi,ngi,nlo	22	NA	NaN
mir-305	dme,dps,ame,aga,bmo,tca,dan,der,dgr,dmo,dpe,dse,dsi,dvi,dwi,dya,aae,cqu,nvi,isc,ngi,nlo	22	NA	NaN
MIR164	ath,osa,zma,sbi,ptc,mtr,tae,bna,vvi,gma,bra,csi,ctr,rco,ghr,aly,tcc,bdi,cme,ssl,vun	21	NA	NaN
mir-148	mmu,hsa,rno,gga,dre,ssc,fru,tni,bta,xtr,mdo,oan,mml,cfa,ptr,eca,tgu,ppy,pma,aca,ola	21	hsa-mir-148a,hsa-mir-152,hsa-mir-148b	3.93701
mir-138	mmu,hsa,rno,gga,dre,fru,tni,xtr,bta,mdo,oan,mml,cfa,ptr,eca,tgu,ppy,pma,aca,ola,sha	21	hsa-mir-138-2,hsa-mir-138-1	0
mir-14	dme,dps,aga,bmo,ame,tca,dan,der,dgr,dmo,dpe,dse,dsi,dvi,dwi,dya,aae,cqu,api,nvi,ngi	21	NA	NaN
MIR399	ath,osa,sbi,mtr,zma,ptc,ghr,bna,tae,vvi,sly,pvu,bdi,aqc,rco,aly,csi,tcc,ssl,vun	20	NA	NaN
mir-129	mmu,hsa,rno,dre,fru,tni,xtr,mdo,oan,mml,cfa,ptr,bta,eca,ssc,tgu,ppy,pma,aca,sha	20	hsa-mir-129-1,hsa-mir-129-2	0
MIR168	ath,osa,sbi,sof,gma,zma,ptc,mtr,bna,vvi,ccl,crt,rco,aly,hvu,tcc,bdi,cme,ssp,vun	20	NA	NaN
mir-143	mmu,hsa,rno,dre,ptr,ggo,ppy,lla,ppa,xtr,mdo,oan,mml,cfa,bta,eca,ssc,pma,aca,ola	20	hsa-mir-143	0
mir-122	mmu,hsa,rno,gga,dre,ssc,fru,tni,xtr,bta,mdo,oan,mml,cfa,ptr,eca,tgu,ppy,aca,ola	20	hsa-mir-122,hsa-mir-3591	12.6582
mir-139	hsa,mmu,rno,ssc,lla,ppa,dre,xtr,bta,oan,mml,cfa,ptr,mdo,eca,tgu,ppy,aca,ola,sha	20	hsa-mir-139	0
mir-12	dme,dps,ame,aga,tca,dan,der,dgr,dmo,dpe,dse,dsi,dvi,dwi,dpu,isc,aae,cqu,nvi,nlo	20	NA	NaN
mir-365	hsa,mmu,cfa,rno,dre,fru,tni,gga,xtr,mdo,bta,oan,mml,ptr,eca,ssc,tgu,ppy,aca	19	hsa-mir-365a,hsa-mir-365b	0
mir-32	hsa,mmu,rno,gga,ssc,mml,ptr,ggo,ppy,sla,mne,ppa,mdo,oan,cfa,bta,eca,tgu,aca	19	hsa-mir-32	0
mir-145	mmu,hsa,rno,dre,ssc,mml,ptr,ggo,ppy,mne,bta,xtr,mdo,oan,cfa,eca,pma,aca,ola	19	hsa-mir-145	11.3636
mir-338	rno,mmu,hsa,dre,fru,tni,xtr,mdo,mml,cfa,ptr,bta,eca,tgu,ssc,ppy,aca,ola,sha	19	hsa-mir-338	0
mir-146	mmu,hsa,rno,gga,dre,xtr,oan,mml,cfa,ptr,bta,ssc,mdo,eca,tgu,ppy,pma,aca,ola	19	hsa-mir-146a,hsa-mir-146b	5.81395
mir-282	dme,dps,ame,aga,bmo,tca,dan,der,dgr,dmo,dpe,dse,dsi,dvi,dwi,dya,aae,nvi,nlo	19	NA	NaN
MIR395	ath,osa,sbi,mtr,zma,ptc,vvi,sly,aqc,rco,aly,pab,tae,csi,tcc,bdi,gma,vun	18	NA	NaN
MIR390	ath,osa,ptc,ppt,mtr,ghr,pta,bna,vvi,gma,sbi,zma,csi,rco,aly,tcc,bdi,cme	18	NA	NaN
MIR408	ath,osa,sof,zma,ptc,ppt,tae,vvi,sbi,rco,aly,ahy,csi,gma,bdi,ssp,mtr,vun	18	NA	NaN
MIR398	ath,osa,gma,ptc,mtr,pta,vvi,bol,aqc,csi,rco,gra,ghr,aly,ahy,tae,tcc,bdi	18	NA	NaN
mir-182	mmu,hsa,dre,mml,ppy,fru,tni,xtr,mdo,rno,ptr,bta,cfa,oan,eca,pma,aca,ola	18	hsa-mir-182	0
mir-455	dre,fru,tni,hsa,gga,mmu,xtr,bta,rno,mml,cfa,ptr,mdo,ssc,tgu,ppy,aca,ola	18	hsa-mir-455	0
mir-451	hsa,mmu,rno,dre,xtr,gga,mdo,oan,mml,ptr,bta,cfa,eca,tgu,ppy,ssc,pma,aca	18	hsa-mir-451a,hsa-mir-451b	0
mir-278	dme,dps,ame,aga,dan,der,dgr,dmo,dpe,dse,dsi,dvi,dwi,dya,dpu,aae,cqu,api	18	NA	NaN
mir-11	dme,dps,aga,dan,der,dgr,dmo,dpe,dse,dsi,dvi,dwi,dya,bmo,aae,cqu,ame,tca	18	NA	NaN
mir-316	dme,dps,dan,der,dgr,dmo,dpe,dse,dsi,dvi,dwi,dya,ame,bmo,aae,cqu,api,tca	18	NA	NaN
mir-28	hsa,mmu,rno,ssc,age,mml,ptr,ggo,ppy,mne,sla,lla,ppa,bta,cfa,mdo,eca	17	hsa-mir-28,hsa-mir-151a	5.68182
mir-132	mmu,hsa,rno,dre,fru,tni,xtr,bta,mdo,mml,cfa,eca,ppy,tgu,pma,aca,ola	17	hsa-mir-212,hsa-mir-132	0
mir-147	hsa,ptr,ppy,sla,mne,ppa,gga,mmu,rno,oan,mml,bta,cfa,mdo,eca,tgu,aca	17	hsa-mir-147a,hsa-mir-147b	0
mir-203	mmu,hsa,rno,gga,dre,fru,tni,xtr,mdo,mml,ptr,cfa,tgu,ppy,pma,aca,ola	17	hsa-mir-203,hsa-mir-3545	0
MIR397	ath,osa,ptc,bna,vvi,sly,sbi,bdi,zma,rco,aly,pab,hvu,csi,tcc,gma,ssl	17	NA	NaN
mir-383	hsa,mmu,rno,gga,xtr,mdo,oan,mml,cfa,ptr,bta,eca,tgu,ppy,ssc,aca,sha	17	hsa-mir-383	27.3973
mir-363	hsa,mmu,dre,rno,xtr,bta,oan,mml,cfa,xla,mdo,eca,tgu,ssc,ppy,aca,sha	17	hsa-mir-363	0
mir-499	hsa,gga,rno,mmu,bta,dre,xtr,oan,mml,cfa,ptr,mdo,eca,ssc,ppy,aca,ola	17	hsa-mir-499a	16.3934
MIR169_1	ath,osa,sbi,zma,ptc,ghb,bna,vvi,sly,aqc,aly,tae,far,tcc,bdi,ssp	16	NA	NaN
MIR169_2	ath,osa,zma,sbi,mtr,gma,ptc,bna,vvi,sly,bdi,aqc,rco,aly,tcc,vun	16	NA	NaN
mir-489	hsa,fru,tni,dre,mmu,rno,gga,xtr,mml,ptr,cfa,bta,eca,tgu,ppy,aca	16	hsa-mir-489	0
mir-993	dme,tca,aga,ame,bmo,dps,dsi,cte,dpu,isc,api,aae,cqu,nvi,ngi,nlo	16	NA	NaN
mir-105	hsa,ssc,ppy,ggo,ppa,ptr,mml,sla,lla,mne,mmu,bta,cfa,rno,eca	15	hsa-mir-105-1,hsa-mir-105-2	6.17284
mir-127	mmu,hsa,rno,oar,mml,ptr,ppy,sla,lla,mne,age,bta,cfa,eca,ssc	15	hsa-mir-127	0
MIR393	ath,osa,sbi,mtr,zma,ptc,bna,vvi,gma,rco,ghr,aly,csi,tcc,bdi	15	NA	NaN
mir-202	mmu,dre,hsa,fru,tni,gga,xtr,ptr,bta,cfa,rno,ssc,tgu,aca,sha	15	hsa-mir-202	0
mir-449	hsa,mmu,rno,cfa,gga,xtr,mdo,oan,mml,ptr,bta,sko,eca,ppy,aca	15	hsa-mir-449a,hsa-mir-449b,hsa-mir-449c	10.7143
mir-3	dme,dps,dan,der,dgr,dmo,dpe,dse,dsi,dvi,dwi,dya,aga,aae,cqu	15	NA	NaN
mir-155	mmu,hsa,gga,dre,xtr,oan,mml,cfa,ptr,bta,eca,tgu,ppy,ssc,aca	15	hsa-mir-155	0
mir-308	dme,dps,aga,dan,der,dgr,dmo,dpe,dse,dsi,dvi,dwi,dya,aae,cqu	15	NA	NaN
mir-208	hsa,mmu,rno,dre,xtr,mdo,oan,mml,ptr,bta,cfa,eca,ssc,ppy,aca	15	hsa-mir-208a,hsa-mir-208b	6.75676
mir-551	hsa,mmu,rno,oan,gga,mml,ptr,bta,cfa,mdo,eca,tgu,ppy,pma,aca	15	hsa-mir-551a,hsa-mir-551b	5.20833
MIR482	ptc,pta,gma,vvi,mdm,pvu,aqc,gra,ghr,gso,pab,csi,mtr,sly,vun	15	NA	NaN
mir-154	mmu,hsa,rno,ssc,ptr,ggo,ppy,mne,ppa,bta,mml,cfa,eca,oar	14	hsa-mir-154,hsa-mir-369,hsa-mir-377,hsa-mir-381,hsa-mir-382,hsa-mir-323a,hsa-mir-409,hsa-mir-410,hsa-mir-487a,hsa-mir-494,hsa-mir-496,hsa-mir-539,hsa-mir-487b,hsa-mir-655,hsa-mir-656,hsa-mir-1185-2,hsa-mir-1185-1,hsa-mir-300,hsa-mir-323b	4.49871
mir-95	hsa,rno,ssc,ptr,ggo,ppy,sla,lla,ppa,mmu,bta,mml,cfa,eca	14	hsa-mir-95,hsa-mir-545,hsa-mir-421,hsa-mir-1264	0
MIR394	ath,osa,sbi,zma,ptc,vvi,ghr,aly,ahy,gma,csi,tcc,bdi,ssl	14	NA	NaN
mir-186	mmu,hsa,rno,ssc,ptr,ggo,ppa,bta,mdo,oan,mml,cfa,eca,ppy	14	hsa-mir-186	0
MIR162_1	ath,mtr,ptc,ghr,cpa,vvi,gma,sly,csi,rco,aly,tcc,aau,vun	14	NA	NaN
mir-191	mmu,hsa,rno,xtr,bta,mdo,oan,mml,cfa,ptr,eca,ssc,ppy,aca	14	hsa-mir-191	0
mir-150	mmu,hsa,rno,xtr,bta,oan,mml,cfa,ptr,mdo,eca,ppy,aca,sha	14	hsa-mir-150	0
mir-286	dme,dps,dan,der,dgr,dmo,dpe,dse,dsi,dvi,dwi,dya,aga,aae	14	NA	NaN
mir-490	hsa,gga,mmu,oan,mml,ptr,bta,cfa,rno,eca,tgu,ppy,ssc,aca	14	hsa-mir-490	0
mir-425	mmu,hsa,xtr,bta,mdo,rno,oan,mml,cfa,ptr,ssc,tgu,ppy,aca	14	hsa-mir-425	0
mir-302	mmu,hsa,gga,xtr,mdo,oan,mml,ptr,bta,cfa,eca,ppy,aca	13	hsa-mir-302a,hsa-mir-302b,hsa-mir-302c,hsa-mir-302d,hsa-mir-302f	9.11854
mir-224	hsa,mmu,ssc,mml,ptr,ggo,ppy,mne,ppa,rno,cfa,bta,eca	13	hsa-mir-224	0
mir-136	mmu,hsa,rno,oar,ssc,ptr,ggo,ppy,ppa,mml,cfa,bta,eca	13	hsa-mir-136	12.1951
mir-134	mmu,hsa,rno,ggo,ppy,mne,ppa,mml,ptr,bta,cfa,eca,oar	13	hsa-mir-134	0
mir-188	mmu,hsa,mml,ptr,ppy,mne,ppa,bta,rno,cfa,eca,ssc	12	hsa-mir-188,hsa-mir-532,hsa-mir-660	10.9489
mir-6	dme,dps,dan,der,dgr,dmo,dpe,dse,dsi,dvi,dwi,dya	12	NA	NaN
mir-367	hsa,mmu,gga,xtr,mdo,mml,ptr,bta,cfa,eca,ppy,aca	12	hsa-mir-367	14.7059
mir-454	dre,hsa,oan,gga,mml,ptr,bta,cfa,eca,tgu,aca,sha	12	hsa-mir-454	0
mir-288	dme,dps,dan,der,dgr,dmo,dpe,dse,dsi,dvi,dwi,dya	12	NA	NaN
mir-287	dme,dps,dan,der,dgr,dmo,dpe,dse,dsi,dvi,dwi,dya	12	NA	NaN
mir-284	dme,dps,dan,der,dgr,dmo,dpe,dse,dsi,dvi,dwi,dya	12	NA	NaN
mir-497	hsa,rno,mmu,bta,mml,cfa,mdo,ptr,eca,ssc,ppy,sha	12	hsa-mir-497	0
mir-314	dme,dps,dan,der,dgr,dmo,dpe,dse,dsi,dvi,dwi,dya	12	NA	NaN
mir-318	dme,dps,dan,der,dgr,dmo,dpe,dse,dsi,dvi,dwi,dya	12	NA	NaN
mir-4	dme,dps,dan,der,dgr,dmo,dpe,dse,dsi,dvi,dwi,dya	12	NA	NaN
mir-5	dme,dps,dan,der,dgr,dmo,dpe,dse,dsi,dvi,dwi,dya	12	NA	NaN
mir-306	dme,dps,dan,der,dgr,dmo,dpe,dse,dvi,dwi,dya,bmo	12	NA	NaN
mir-929	ame,dme,tca,bmo,aga,dps,dsi,api,aae,nvi,ngi,nlo	12	NA	NaN
mir-927	ame,dme,bmo,tca,aga,dps,dsi,aae,api,nvi,ngi,nlo	12	NA	NaN
mir-965	dme,tca,aga,bmo,dps,dsi,dpu,aae,cqu,api,ame,smr	12	NA	NaN
mir-981	dme,aga,cte,lgi,tca,ame,dps,dsi,dpu,aae,cqu,spu	12	NA	NaN
mir-368	hsa,mmu,rno,mml,cfa,ptr,bta,eca,ssc,ppy,oar	11	hsa-mir-376c,hsa-mir-376a-1,hsa-mir-376b,hsa-mir-376a-2	0
mir-379	hsa,mmu,rno,bta,mml,cfa,ptr,eca,ssc,ppy,oar	11	hsa-mir-379,hsa-mir-380,hsa-mir-411,hsa-mir-758,hsa-mir-1197	10
mir-506	hsa,mmu,age,ssy,mml,ptr,pbi,cfa,eca,ppy,rno	11	hsa-mir-511-1,hsa-mir-511-2,hsa-mir-512-1,hsa-mir-512-2,hsa-mir-513a-1,hsa-mir-513a-2,hsa-mir-506,hsa-mir-507,hsa-mir-508,hsa-mir-509-1,hsa-mir-510,hsa-mir-514a-1,hsa-mir-514a-2,hsa-mir-514a-3,hsa-mir-509-2,hsa-mir-509-3,hsa-mir-513b,hsa-mir-513c,hsa-mir-514b	2.77624
mir-299	mmu,hsa,rno,mml,bta,cfa,ptr,eca,ssc,ppy,oar	11	hsa-mir-299	15.873
mir-280	dme,dps,dan,der,dgr,dmo,dpe,dse,dvi,dwi,dya	11	NA	NaN
mir-274	dme,dps,dan,der,dgr,dmo,dpe,dse,dvi,dwi,dya	11	NA	NaN
mir-304	dme,dps,dan,der,dgr,dmo,dse,dsi,dvi,dwi,dya	11	NA	NaN
mir-875	hsa,mmu,oan,mml,ptr,bta,cfa,mdo,rno,ppy,aca	11	hsa-mir-875	0
mir-1306	hsa,gga,cfa,xla,ptr,mmu,bta,ssc,ppy,aca,ola	11	hsa-mir-1306	0
mir-932	ame,dme,tca,bmo,dps,dsi,aae,cqu,nvi,ngi,nlo	11	NA	NaN
mir-198	hsa,ggo,age,ppa,ppy,ptr,mml,sla,lla,mne	10	hsa-mir-198	16.129
mir-329	rno,mmu,hsa,mml,cfa,ptr,bta,eca,ppy,oar	10	hsa-mir-329-1,hsa-mir-329-2,hsa-mir-495,hsa-mir-543	0
mir-197	hsa,ptr,ppy,mne,age,ppa,mml,cfa,bta,eca	10	hsa-mir-197	13.3333
mir-450	hsa,mmu,rno,cfa,bta,mml,ptr,ssc,eca,ppy	10	hsa-mir-450a-1,hsa-mir-450a-2,hsa-mir-450b	7.43494
mir-500	hsa,rno,mmu,mml,cfa,ptr,bta,eca,ssc,ppy	10	hsa-mir-500a,hsa-mir-501,hsa-mir-502,hsa-mir-500b	6.00601
mir-322	rno,mmu,hsa,mml,cfa,ptr,bta,eca,ssc,ppy	10	hsa-mir-424	0
mir-324	rno,mmu,hsa,mml,ptr,bta,cfa,eca,ssc,ppy	10	hsa-mir-324	0
mir-370	hsa,mmu,rno,mml,ptr,bta,cfa,eca,ppy,oar	10	hsa-mir-370	0
mir-378	hsa,mmu,rno,mml,cfa,ptr,bta,eca,ssc,ppy	10	hsa-mir-378a	0
mir-361	hsa,mmu,rno,bta,mml,cfa,ptr,eca,ssc,ppy	10	hsa-mir-361	0
mir-433	mmu,hsa,rno,mml,cfa,ptr,bta,eca,ppy,oar	10	hsa-mir-433	0
mir-345	rno,mmu,hsa,bta,mml,cfa,ptr,eca,ssc,ppy	10	hsa-mir-345	0
mir-342	rno,mmu,hsa,bta,mml,cfa,ptr,eca,ssc,ppy	10	hsa-mir-342	0
mir-340	rno,mmu,hsa,mml,ptr,bta,cfa,eca,ssc,ppy	10	hsa-mir-340	0
mir-335	rno,hsa,mmu,mml,cfa,ptr,bta,eca,ssc,ppy	10	hsa-mir-335	0
mir-331	rno,mmu,hsa,bta,mml,ptr,cfa,eca,ssc,ppy	10	hsa-mir-331	0
mir-485	hsa,mmu,rno,mml,cfa,ptr,bta,eca,ppy,oar	10	hsa-mir-485	13.6986
mir-362	hsa,mmu,mml,ptr,bta,cfa,rno,eca,ppy,ssc	10	hsa-mir-362	0
mir-432	oar,hsa,mml,ptr,bta,cfa,mmu,eca,ssc,ppy	10	hsa-mir-432	0
mir-505	hsa,rno,mmu,mml,ptr,bta,cfa,eca,ssc,ppy	10	hsa-mir-505	11.9048
mir-374	hsa,rno,mmu,bta,mml,cfa,ptr,eca,ssc,ppy	10	hsa-mir-374a,hsa-mir-374b,hsa-mir-374c	0
mir-664	rno,hsa,mml,cfa,ptr,bta,mmu,eca,ssc,ppy	10	hsa-mir-664,hsa-mir-644b	20.979
mir-423	hsa,mmu,bta,rno,mml,cfa,ptr,eca,ssc,ppy	10	hsa-mir-423	0
mir-615	hsa,mmu,mml,ptr,bta,cfa,rno,eca,ppy,ssc	10	hsa-mir-615	0
mir-708	mmu,hsa,rno,cfa,ptr,bta,mml,eca,ssc,ppy	10	hsa-mir-708	0
mir-544	hsa,mmu,mml,ptr,bta,cfa,rno,eca,ppy,oar	10	hsa-mir-544a,hsa-mir-544b	0
mir-504	hsa,mmu,mml,ptr,bta,cfa,rno,eca,ssc,ppy	10	hsa-mir-504	0
mir-290	mmu,hsa,rno,mml,cfa,ptr,bta,eca,ppy	9	hsa-mir-371a,hsa-mir-372,hsa-mir-371b	0
MIR171_2	osa,sbi,zma,ptc,vvi,gma,ghr,csi,mtr	9	NA	NaN
mir-460	dre,fru,tni,gga,oan,mdo,tgu,aca,ola	9	NA	NaN
mir-431	oar,mmu,hsa,rno,mml,ptr,bta,eca,ppy	9	hsa-mir-431	8.77193
mir-326	mmu,rno,hsa,ssc,ptr,bta,cfa,eca,ppy	9	hsa-mir-326	0
mir-448	hsa,mmu,rno,cfa,mml,ptr,bta,eca,ppy	9	hsa-mir-448	0
mir-296	mmu,hsa,rno,mml,ptr,bta,eca,ppy,ssc	9	hsa-mir-296	12.5
mir-320	hsa,mmu,rno,bta,mml,cfa,ptr,ssc,ppy	9	hsa-mir-320a,hsa-mir-320b-1,hsa-mir-320c-1,hsa-mir-320b-2,hsa-mir-320d-1,hsa-mir-320c-2,hsa-mir-320d-2,hsa-mir-320e	0
mir-503	hsa,mmu,rno,mml,cfa,ptr,ssc,eca,ppy	9	hsa-mir-503	0
mir-542	mmu,rno,hsa,mml,cfa,bta,eca,ssc,ppy	9	hsa-mir-542	0
mir-346	rno,mmu,hsa,mml,ptr,bta,cfa,eca,ppy	9	hsa-mir-346	0
mir-412	mmu,hsa,rno,mml,ptr,bta,eca,ppy,oar	9	hsa-mir-412	21.978
mir-330	rno,mmu,hsa,mml,ptr,bta,cfa,eca,ppy	9	hsa-mir-330	0
mir-185	mmu,hsa,rno,mml,cfa,ssc,ptr,bta,ppy	9	hsa-mir-185	0
mir-328	rno,mmu,hsa,cfa,ptr,bta,eca,ssc,ppy	9	hsa-mir-328	0
mir-493	hsa,rno,mmu,mml,cfa,bta,eca,ppy,oar	9	hsa-mir-493	0
mir-488	hsa,mmu,rno,mml,ptr,bta,cfa,eca,ppy	9	hsa-mir-488	24.0964
mir-491	hsa,mmu,mml,cfa,ptr,bta,eca,ppy,ssc	9	hsa-mir-491	0
mir-652	hsa,mmu,rno,mml,cfa,ptr,eca,ppy,ssc	9	hsa-mir-652	0
mir-592	hsa,mmu,mml,ptr,bta,cfa,rno,eca,ppy	9	hsa-mir-592	0
mir-802	hsa,mmu,oan,mml,ptr,cfa,rno,eca,ppy	9	hsa-mir-802	0
mir-671	hsa,mmu,rno,mml,ptr,bta,cfa,eca,ppy	9	hsa-mir-671	0
mir-874	mmu,hsa,rno,mml,ptr,bta,cfa,eca,ppy	9	hsa-mir-874	0
mir-568	hsa,mmu,mml,ptr,bta,cfa,rno,eca,ppy	9	hsa-mir-568	21.0526
mir-582	hsa,mmu,mml,ptr,bta,cfa,rno,eca,ppy	9	hsa-mir-582	0
mir-876	mmu,hsa,mml,ptr,bta,cfa,rno,eca,ppy	9	hsa-mir-876	0
mir-653	hsa,mmu,mml,ptr,bta,cfa,rno,eca,ppy	9	hsa-mir-653	0
mir-628	hsa,mml,ptr,bta,cfa,rno,eca,ssc,ppy	9	hsa-mir-628	0
mir-885	hsa,mml,ptr,bta,cfa,mdo,eca,ssc,ppy	9	hsa-mir-885	13.5135
mir-1000	dme,tca,aga,ame,dps,dsi,aae,cqu,api	9	NA	NaN
mir-761	hsa,mmu,bta,cfa,mdo,mml,ptr,rno,eca	9	hsa-mir-761	0
MIR2111	ath,bna,mtr,aly,vvi,lja,bra,tcc,gma	9	NA	NaN
MIR535	ppt,osa,vvi,aqc,rco,pab,csi,tcc	8	NA	NaN
mir-458	dre,fru,tni,oan,gga,tgu,aca,ola	8	NA	NaN
mir-339	rno,mmu,hsa,mml,ptr,bta,ssc,ppy	8	hsa-mir-339	21.2766
mir-541	mmu,rno,hsa,bta,mml,eca,ppy,oar	8	hsa-mir-541	0
mir-484	hsa,mmu,bta,rno,mml,ptr,ppy,ssc	8	hsa-mir-484	0
mir-486	hsa,mmu,mml,ptr,bta,eca,ssc,ppy	8	hsa-mir-486	0
mir-289	dme,dps,dan,der,dpe,dse,dsi,dya	8	NA	NaN
mir-149	mmu,hsa,mml,ptr,cfa,eca,ppy,ssc	8	hsa-mir-149	0
MIR403	ath,ptc,vvi,rco,aly,csi,tcc,gma	8	NA	NaN
mir-873	mmu,hsa,rno,oan,ptr,bta,eca,ppy	8	hsa-mir-873	0
mir-665	mmu,hsa,ptr,bta,cfa,mml,rno,oar	8	hsa-mir-665	0
mir-590	hsa,mmu,oan,mml,cfa,ptr,eca,ppy	8	hsa-mir-590	30.9278
mir-1224	hsa,mmu,ptr,mml,bta,rno,ppy,ssc	8	hsa-mir-1224	0
mir-599	hsa,mml,ptr,bta,cfa,mdo,mmu,ppy	8	hsa-mir-599	0
mir-310	dme,dan,der,dse,dsi,dvi,dya,dps	8	NA	NaN
mir-970	dme,tca,aga,bmo,dps,dsi,aae,cqu	8	NA	NaN
mir-759	hsa,mmu,bta,cfa,mdo,mml,ptr,rno	8	hsa-mir-759	10.989
mir-764	hsa,mmu,cfa,bta,mml,ptr,rno,eca	8	hsa-mir-764	0
mir-1175	aga,cte,lgi,bmo,aae,cqu,ame,tca	8	NA	NaN
mir-325	rno,mmu,hsa,ssc,mml,cfa,ppy	7	hsa-mir-325	0
mir-337	rno,mmu,hsa,mml,ptr,eca,ppy	7	hsa-mir-337	0
mir-297	mmu,rno,hsa,mml,ptr,bta,ppy	7	hsa-mir-297	15.1515
mir-452	hsa,mmu,mml,ptr,bta,cfa,ppy	7	hsa-mir-452	0
mir-384	hsa,mmu,rno,mml,cfa,eca,ppy	7	hsa-mir-384	0
mir-770	mmu,hsa,rno,mml,ptr,eca,ppy	7	hsa-mir-770	0
mir-668	hsa,mmu,mml,ptr,rno,ppy,oar	7	hsa-mir-668	0
mir-598	hsa,mmu,rno,mml,ptr,eca,ppy	7	hsa-mir-598	0
mir-760	mmu,hsa,rno,ptr,bta,mml,ppy	7	hsa-mir-760	0
mir-654	hsa,mmu,mml,ptr,bta,ppy,oar	7	hsa-mir-654	0
mir-1271	hsa,cfa,ptr,bta,eca,ppy,ssc	7	hsa-mir-1271	0
mir-632	hsa,mml,ptr,cfa,rno,eca,ppy	7	hsa-mir-632	0
mir-1388	oan,dre,bta,tgu,aca,ola,sha	7	NA	NaN
mir-iab-8	dme,dps,dsi,bmo,nvi,tca,ngi	7	NA	NaN
MIR167_2	ath,sbi,sof,zma,aly,ssp	6	NA	NaN
mir-298	mmu,rno,hsa,mml,ptr,ppy	6	hsa-mir-298	0
mir-675	mmu,hsa,mml,rno,eca,ppy	6	hsa-mir-675	0
mir-743	mmu,hsa,rno,mml,ptr,ppy	6	hsa-mir-892a,hsa-mir-890,hsa-mir-888,hsa-mir-892b	9.80392
mir-877	mmu,hsa,rno,mml,bta,ppy	6	hsa-mir-877	0
MIR444	osa,tae,bdi,hvu,ssp,zma	6	NA	NaN
mir-744	mmu,hsa,ptr,bta,ssc,ppy	6	hsa-mir-744	0
mir-631	hsa,mml,bta,cfa,ptr,ppy	6	hsa-mir-631	0
mir-767	hsa,mml,bta,mmu,eca,ppy	6	hsa-mir-767	0
mir-1307	hsa,cfa,ptr,bta,ssc,ppy	6	hsa-mir-1307	0
mir-312	dme,dan,der,dse,dsi,dya	6	NA	NaN
mir-1298	hsa,mmu,ptr,bta,eca,ppy	6	hsa-mir-1298	0
mir-1296	hsa,ptr,bta,eca,ppy,ssc	6	hsa-mir-1296	0
mir-1249	mmu,hsa,ptr,bta,ppy,rno	6	hsa-mir-1249	0
mir-1193	mmu,bta,eca,hsa,rno,oar	6	hsa-mir-1193	0
mir-957	dme,aga,dps,dsi,aae,cqu	6	NA	NaN
mir-988	dme,aga,dps,dsi,aae,cqu	6	NA	NaN
mir-670	hsa,mmu,bta,mml,ptr,eca	6	hsa-mir-670	0
mir-711	mmu,hsa,mml,ptr,rno,eca	6	hsa-mir-711	0
mir-989	dme,aga,dps,dsi,aae,cqu	6	NA	NaN
mir-44	cel,cbr,crm,ppc,asu	5	NA	NaN
mir-81	cel,cbr,crm,bma,asu	5	NA	NaN
mir-483	hsa,mmu,rno,bta,cfa	5	hsa-mir-483	0
MIR477	ptc,ppt,vvi,aqc,csi	5	NA	NaN
mir-50	cel,cbr,crm,asu,bma	5	NA	NaN
mir-57	cel,cbr,crm,asu,bma	5	NA	NaN
lin-4	cel,cbr,crm,bma,asu	5	NA	NaN
mir-467	mmu,rno,hsa,ssc,ppy	5	hsa-mir-1277,hsa-mir-466	12.3457
mir-456	dre,gga,tgu,pma,aca	5	NA	NaN
MIR824	ath,bol,bra,bna,aly	5	NA	NaN
mir-1225	hsa,mml,ptr,bta,ppy	5	hsa-mir-1225	0
mir-996	dme,aga,aae,cqu,api	5	NA	NaN
mir-589	hsa,mml,cfa,ptr,ppy	5	hsa-mir-589	0
mir-492	hsa,mml,ptr,eca,ppy	5	hsa-mir-492	0
mir-562	hsa,mml,ptr,bta,ppy	5	hsa-mir-562	10.5263
mir-889	hsa,mml,ptr,eca,ppy	5	hsa-mir-889	0
MIR530	ptc,aqc,csi,tcc,gma	5	NA	NaN
mir-584	hsa,mml,ptr,bta,ppy	5	hsa-mir-584	0
mir-1282	hsa,ptr,bta,eca,ppy	5	hsa-mir-1282	0
mir-1291	hsa,ptr,bta,eca,ppy	5	hsa-mir-1291	0
mir-935	hsa,ptr,bta,rno,ssc	5	hsa-mir-935	0
mir-1251	hsa,ptr,bta,mmu,ppy	5	hsa-mir-1251	0
mir-1248	hsa,ptr,bta,eca,ppy	5	hsa-mir-1248	0
mir-762	hsa,mmu,gga,mml,ptr	5	hsa-mir-762	0
mir-1179	hsa,ptr,bta,eca,ppy	5	hsa-mir-1179	0
mir-1329	oan,gga,tgu,aca,sha	5	NA	NaN
mir-1839	cfa,mmu,bta,eca,ssc	5	NA	NaN
mir-242_2	bfl,lgi,sko,spu,cte	5	NA	NaN
MIR2118	osa,pvu,mtr,zma,gma	5	NA	NaN
MIR437	osa,sbi,bdi,far,ssp	5	NA	NaN
mir-1912	hsa,eca,mmu,ppy,rno	5	hsa-mir-1912	0
mir-1788	gga,dre,pma,aca,ola	5	NA	NaN
mir-2188	dre,xtr,tgu,gga,aca	5	NA	NaN
MIR528	osa,zma,sbi,bdi,ssp	5	NA	NaN
mir-980	dme,dps,dsi,aae,cqu	5	NA	NaN
MIR319	ptc,vvi,csi,tcc,gma	5	NA	NaN
mir-515	hsa,mml,ptr,ppy	4	hsa-mir-520e,hsa-mir-515-1,hsa-mir-519e,hsa-mir-520f,hsa-mir-515-2,hsa-mir-519c,hsa-mir-520a,hsa-mir-526b,hsa-mir-519b,hsa-mir-525,hsa-mir-523,hsa-mir-518f,hsa-mir-520b,hsa-mir-518b,hsa-mir-526a-1,hsa-mir-520c,hsa-mir-518c,hsa-mir-524,hsa-mir-517a,hsa-mir-519d,hsa-mir-521-2,hsa-mir-520d,hsa-mir-517b,hsa-mir-520g,hsa-mir-516b-2,hsa-mir-526a-2,hsa-mir-518e,hsa-mir-518a-1,hsa-mir-518d,hsa-mir-516b-1…	5.02232
mir-36	cel,cbr,crm,bma	4	NA	NaN
mir-239	cel,cbr,crm,ppc	4	NA	NaN
MIR162_2	osa,zma,sbi,bdi	4	NA	NaN
mir-350	rno,mmu,cfa,eca	4	NA	NaN
mir-84	cel,cbr,crm,ppc	4	NA	NaN
mir-548	hsa,mml,ptr,ppy	4	hsa-mir-570,hsa-mir-579,hsa-mir-548a-1,hsa-mir-548b,hsa-mir-548a-2,hsa-mir-548a-3,hsa-mir-603,hsa-mir-548c,hsa-mir-548d-1,hsa-mir-548d-2,hsa-mir-548e,hsa-mir-548j,hsa-mir-548k,hsa-mir-548l,hsa-mir-548f-1,hsa-mir-548f-2,hsa-mir-548f-3,hsa-mir-548f-4,hsa-mir-548f-5,hsa-mir-548g,hsa-mir-548n,hsa-mir-548m,hsa-mir-548h-1,hsa-mir-548h-2,hsa-mir-548h-3,hsa-mir-548h-4,hsa-mir-548p,hsa-mir-548i-1,hsa-mir-…	6.08653
MIR1122	tae,bdi,far,mtr	4	NA	NaN
mir-872	mmu,rno,cfa,eca	4	NA	NaN
mir-574	hsa,mmu,cfa,ssc	4	hsa-mir-574	10.4167
mir-891	hsa,mml,ptr,ppy	4	hsa-mir-891a,hsa-mir-891b	0
mir-1226	hsa,ptr,mml,ppy	4	hsa-mir-1226	26.6667
mir-1227	hsa,mml,ptr,ppy	4	hsa-mir-1227	11.3636
mir-1302	hsa,ptr,eca,ppy	4	hsa-mir-1302-1,hsa-mir-1302-2,hsa-mir-1302-3,hsa-mir-1302-4,hsa-mir-1302-5,hsa-mir-1302-6,hsa-mir-1302-7,hsa-mir-1302-8,hsa-mir-1302-9,hsa-mir-1302-10,hsa-mir-1302-11	0.702741
mir-650	hsa,mml,ptr,ppy	4	hsa-mir-650	0
mir-663	hsa,mml,ptr,ppy	4	hsa-mir-663a,hsa-mir-663b	0
mir-498	hsa,mml,ptr,ppy	4	hsa-mir-498	0
mir-612	hsa,mml,ptr,ppy	4	hsa-mir-612	0
mir-581	hsa,mml,ptr,ppy	4	hsa-mir-581	20.8333
mir-586	hsa,mml,ptr,ppy	4	hsa-mir-586	10.3093
mir-938	hsa,mml,ptr,ppy	4	hsa-mir-938	12.0482
mir-549	hsa,mml,ptr,ppy	4	hsa-mir-549	10.4167
mir-676	mmu,cfa,ssc,hsa	4	hsa-mir-676	0
mir-626	hsa,mml,ptr,ppy	4	hsa-mir-626	0
mir-556	hsa,mml,ptr,ppy	4	hsa-mir-556	0
mir-651	hsa,mml,ptr,ppy	4	hsa-mir-651	10.3093
mir-597	hsa,mml,ptr,ppy	4	hsa-mir-597	10.3093
mir-583	hsa,mml,ptr,ppy	4	hsa-mir-583	0
mir-600	hsa,mml,ptr,ppy	4	hsa-mir-600	0
mir-553	hsa,mml,ptr,ppy	4	hsa-mir-553	14.7059
mir-939	hsa,mml,ptr,ppy	4	hsa-mir-939	0
mir-576	hsa,mml,ptr,ppy	4	hsa-mir-576	10.2041
mir-640	hsa,mml,ptr,ppy	4	hsa-mir-640	10.4167
mir-920	hsa,mml,ptr,ppy	4	hsa-mir-920	0
mir-373	hsa,mml,ptr,ppy	4	hsa-mir-373	14.4928
mir-593	hsa,mml,ptr,ppy	4	hsa-mir-593	10
mir-933	hsa,mml,ptr,ppy	4	hsa-mir-933	25.974
mir-1255	hsa,ptr,eca,ppy	4	hsa-mir-1255a,hsa-mir-1255b-1,hsa-mir-1255b-2	20.5761
mir-616	hsa,mml,ptr,ppy	4	hsa-mir-616	0
mir-942	hsa,mml,ptr,ppy	4	hsa-mir-942	0
mir-924	hsa,mml,ptr,ppy	4	hsa-mir-924	0
mir-580	hsa,mml,ptr,ppy	4	hsa-mir-580	0
mir-609	hsa,mml,ptr,ppy	4	hsa-mir-609	0
mir-936	hsa,mml,ptr,ppy	4	hsa-mir-936	30.6122
mir-557	hsa,mml,ptr,ppy	4	hsa-mir-557	10.2041
mir-601	hsa,mml,ptr,ppy	4	hsa-mir-601	0
mir-624	hsa,mml,ptr,ppy	4	hsa-mir-624	10.3093
mir-605	hsa,mml,ptr,ppy	4	hsa-mir-605	24.0964
mir-577	hsa,mml,ptr,ppy	4	hsa-mir-577	0
mir-569	hsa,mml,ptr,ppy	4	hsa-mir-569	0
mir-922	hsa,mml,ptr,ppy	4	hsa-mir-922	24.6914
mir-558	hsa,mml,ptr,ppy	4	hsa-mir-558	0
mir-940	hsa,mml,ptr,bta	4	hsa-mir-940	21.2766
mir-944	hsa,mml,ptr,ppy	4	hsa-mir-944	22.7273
mir-934	hsa,mml,ptr,ppy	4	hsa-mir-934	0
mir-765	hsa,mml,ptr,ppy	4	hsa-mir-765	0
mir-633	hsa,mml,ptr,ppy	4	hsa-mir-633	0
mir-422	hsa,mml,ptr,ppy	4	hsa-mir-422a	0
mir-554	hsa,mml,ptr,ppy	4	hsa-mir-554	0
mir-618	hsa,mml,ptr,ppy	4	hsa-mir-618	0
mir-887	hsa,mml,ptr,ppy	4	hsa-mir-887	0
mir-567	hsa,mml,ptr,ppy	4	hsa-mir-567	10.2041
mir-619	hsa,mml,ptr,ppy	4	hsa-mir-619	0
mir-937	hsa,mml,ptr,ppy	4	hsa-mir-937	0
mir-604	hsa,mml,ptr,ppy	4	hsa-mir-604	10.6383
mir-587	hsa,mml,ptr,ppy	4	hsa-mir-587	0
mir-1244	hsa,ptr,eca,ppy	4	hsa-mir-1244-1,hsa-mir-1244-2,hsa-mir-1244-3	0
mir-1233	hsa,ptr,mml,ppy	4	hsa-mir-1233-1,hsa-mir-1233-2	0
mir-1273	hsa,ptr,ssc,ppy	4	hsa-mir-1273a,hsa-mir-1273d,hsa-mir-1273e,hsa-mir-4430,hsa-mir-4459,hsa-mir-1273f,hsa-mir-1273g	5.96421
mir-1256	hsa,ptr,bta,ppy	4	hsa-mir-1256	0
mir-1284	hsa,ptr,bta,ppy	4	hsa-mir-1284	0
mir-622	hsa,ptr,mml,ppy	4	hsa-mir-622	0
mir-658	hsa,ptr,bta,ppy	4	hsa-mir-658	0
mir-595	hsa,ptr,mml,ppy	4	hsa-mir-595	0
mir-1247	mmu,hsa,ptr,ppy	4	hsa-mir-1247	0
mir-1204	hsa,ptr,eca,ppy	4	hsa-mir-1204	0
mir-1281	hsa,ptr,bta,ppy	4	hsa-mir-1281	0
MIR1507	gma,mtr,vun,gso	4	NA	NaN
mir-718	mmu,cfa,hsa,ptr	4	hsa-mir-718	0
mir-769	hsa,bta,eca,ssc	4	hsa-mir-769	0
mir-1301	hsa,bta,eca,ppy	4	hsa-mir-1301	0
mir-571	hsa,mml,ptr,ppy	4	hsa-mir-571	0
mir-1468	hsa,bta,eca,ppy	4	hsa-mir-1468	0
MIR169_7	osa,zma,sbi,bdi	4	NA	NaN
mir-999	dme,dsi,aae,cqu	4	NA	NaN
mir-2964	tgu,gga,rno,hsa	4	hsa-mir-2964a	0
mir-971	dme,dps,api,ame	4	NA	NaN
mir-2796	bmo,nvi,ame,tca	4	NA	NaN
mir-2788	bmo,ame,tca,hme	4	NA	NaN
mir-430	dre,ola,pma	3	NA	NaN
mir-52	cel,cbr,crm	3	NA	NaN
mir-90	cel,cbr,crm	3	NA	NaN
mir-357	cel,cbr,crm	3	NA	NaN
mir-236	cel,cbr,crm	3	NA	NaN
mir-42	cel,cbr,crm	3	NA	NaN
mir-43	cel,cbr,crm	3	NA	NaN
mir-355	cel,cbr,crm	3	NA	NaN
mir-49	cel,cbr,crm	3	NA	NaN
mir-86	cel,cbr,crm	3	NA	NaN
mir-241	cel,cbr,crm	3	NA	NaN
mir-85	cel,cbr,crm	3	NA	NaN
mir-83	cel,cbr,crm	3	NA	NaN
mir-244	cel,cbr,crm	3	NA	NaN
mir-245	cel,cbr,crm	3	NA	NaN
mir-80	cel,cbr,crm	3	NA	NaN
mir-246	cel,cbr,crm	3	NA	NaN
mir-248	cel,cbr,crm	3	NA	NaN
mir-249	cel,cbr,crm	3	NA	NaN
mir-55	cel,cbr,crm	3	NA	NaN
mir-77	cel,cbr,crm	3	NA	NaN
mir-75	cel,cbr,crm	3	NA	NaN
mir-74	cel,cbr,crm	3	NA	NaN
mir-73	cel,cbr,crm	3	NA	NaN
mir-58	cel,cbr,crm	3	NA	NaN
mir-250	cel,cbr,crm	3	NA	NaN
mir-253	cel,cbr,crm	3	NA	NaN
mir-228	cel,cbr,crm	3	NA	NaN
mir-62	cel,cbr,crm	3	NA	NaN
mir-61	cel,cbr,crm	3	NA	NaN
mir-60	cel,cbr,crm	3	NA	NaN
mir-259	cel,cbr,crm	3	NA	NaN
mir-39	cel,cbr,crm	3	NA	NaN
mir-230	cel,cbr,crm	3	NA	NaN
mir-231	cel,cbr,crm	3	NA	NaN
mir-232	cel,cbr,crm	3	NA	NaN
mir-233	cel,cbr,crm	3	NA	NaN
mir-550	hsa,mml,ptr	3	hsa-mir-550a-1,hsa-mir-550a-2,hsa-mir-550a-3,hsa-mir-550b-1,hsa-mir-550b-2	6.21118
mir-790	cel,cbr,crm	3	NA	NaN
mir-786	cel,cbr,crm	3	NA	NaN
mir-242	cel,cbr,crm	3	NA	NaN
mir-235	cel,cbr,crm	3	NA	NaN
MIR529	osa,ppt,bdi	3	NA	NaN
mir-672	mmu,rno,eca	3	NA	NaN
mir-1497	odi,cin,csa	3	NA	NaN
mir-661	hsa,mml,ptr	3	hsa-mir-661	0
mir-642	hsa,mml,ptr	3	hsa-mir-642a,hsa-mir-642b	22.9885
mir-648	hsa,mml,ppy	3	hsa-mir-648	0
mir-578	hsa,mml,ppy	3	hsa-mir-578	0
mir-638	hsa,mml,ppy	3	hsa-mir-638	0
mir-643	hsa,mml,ptr	3	hsa-mir-643	0
mir-657	hsa,mml,ptr	3	hsa-mir-657	0
mir-552	hsa,mml,ptr	3	hsa-mir-552	0
mir-512	mml,ptr,ppy	3	NA	NaN
mir-563	hsa,mml,ppy	3	hsa-mir-563	0
mir-636	hsa,mml,ppy	3	hsa-mir-636	0
mir-572	hsa,mml,ptr	3	hsa-mir-572	0
mir-611	hsa,mml,ppy	3	hsa-mir-611	14.9254
MIR828	ath,vvi,aly	3	NA	NaN
mir-649	hsa,mml,ptr	3	hsa-mir-649	0
mir-639	hsa,mml,ppy	3	hsa-mir-639	0
mir-627	hsa,mml,ptr	3	hsa-mir-627	10.3093
mir-1285	hsa,ptr,ppy	3	hsa-mir-1285-1,hsa-mir-1285-2	0
mir-573	hsa,mml,ppy	3	hsa-mir-573	0
mir-566	hsa,ptr,ppy	3	hsa-mir-566	0
mir-555	hsa,ptr,ppy	3	hsa-mir-555	0
mir-1297	hsa,ptr,ppy	3	hsa-mir-1297	0
mir-1237	hsa,ptr,ppy	3	hsa-mir-1237	0
mir-575	hsa,ptr,ppy	3	hsa-mir-575	10.6383
mir-1324	hsa,ptr,ppy	3	hsa-mir-1324	0
mir-613	hsa,ptr,ppy	3	hsa-mir-613	0
mir-1234	hsa,ptr,mml	3	hsa-mir-1234	0
mir-1262	hsa,ptr,ppy	3	hsa-mir-1262	0
mir-1207	hsa,ptr,ppy	3	hsa-mir-1207	22.9885
mir-637	hsa,ptr,ppy	3	hsa-mir-637	10.101
mir-634	hsa,ptr,ppy	3	hsa-mir-634	0
mir-1178	hsa,ptr,ppy	3	hsa-mir-1178	0
mir-646	hsa,ptr,ppy	3	hsa-mir-646	21.2766
mir-1303	hsa,ptr,ppy	3	hsa-mir-1303	0
mir-1205	hsa,ptr,ppy	3	hsa-mir-1205	0
mir-1290	hsa,ptr,ppy	3	hsa-mir-1290	0
mir-1253	hsa,ptr,ppy	3	hsa-mir-1253	0
mir-564	hsa,ptr,ppy	3	hsa-mir-564	0
mir-1202	hsa,ptr,ppy	3	hsa-mir-1202	12.0482
mir-1254	hsa,ptr,ppy	3	hsa-mir-1254-1,hsa-mir-1254-2	6.25
mir-1266	hsa,ptr,ppy	3	hsa-mir-1266	0
mir-1323	hsa,ptr,ppy	3	hsa-mir-1323	0
mir-1245	hsa,ptr,ppy	3	hsa-mir-1245a,hsa-mir-1245b	0
mir-1299	hsa,ptr,ppy	3	hsa-mir-1299	0
mir-1289	hsa,ptr,ppy	3	hsa-mir-1289-1,hsa-mir-1289-2	0
mir-1246	hsa,ptr,ppy	3	hsa-mir-1246	0
mir-1208	hsa,ptr,ppy	3	hsa-mir-1208	0
mir-621	hsa,ptr,ppy	3	hsa-mir-621	0
mir-1267	hsa,ptr,ppy	3	hsa-mir-1267	0
mir-591	hsa,ptr,ppy	3	hsa-mir-591	0
mir-1397	oan,gga,aca	3	NA	NaN
mir-1827	hsa,ptr,ppy	3	hsa-mir-1827	0
mir-614	hsa,ptr,ppy	3	hsa-mir-614	0
mir-1280	hsa,ptr,ppy	3	hsa-mir-1280	0
mir-630	hsa,ptr,ppy	3	hsa-mir-630	0
mir-559	hsa,ptr,ppy	3	hsa-mir-559	10.4167
mir-645	hsa,ptr,ppy	3	hsa-mir-645	0
mir-302_2	hsa,ptr,ppy	3	hsa-mir-302e	0
mir-610	hsa,ptr,ppy	3	hsa-mir-610	0
mir-1322	hsa,ptr,ppy	3	hsa-mir-1322	28.169
mir-720	hsa,ptr,ppy	3	hsa-mir-720	9.09091
mir-1181	hsa,ptr,ppy	3	hsa-mir-1181	0
mir-1183	hsa,ptr,ppy	3	hsa-mir-1183	0
mir-617	hsa,ptr,ppy	3	hsa-mir-617	0
mir-1275	hsa,ptr,ppy	3	hsa-mir-1275	0
mir-1292	hsa,ptr,ppy	3	hsa-mir-1292	0
mir-1295	hsa,ptr,ppy	3	hsa-mir-1295a	0
mir-766	hsa,ptr,ppy	3	hsa-mir-766	0
mir-588	hsa,ptr,ppy	3	hsa-mir-588	0
mir-1286	hsa,ptr,ppy	3	hsa-mir-1286	0
mir-1263	hsa,ptr,ppy	3	hsa-mir-1263	0
mir-1265	hsa,ptr,ppy	3	hsa-mir-1265	0
mir-1236	hsa,ptr,ppy	3	hsa-mir-1236	9.80392
mir-943	hsa,ptr,ppy	3	hsa-mir-943	10.6383
mir-1250	hsa,ptr,ppy	3	hsa-mir-1250	0
MIR1510	gma,mtr,gso	3	NA	NaN
mir-1992	cte,cla,lgi	3	NA	NaN
mir-1990	hru,lgi,cte	3	NA	NaN
mir-763	mmu,bta,eca	3	NA	NaN
mir-1287	hsa,bta,ppy	3	hsa-mir-1287	0
MIR827	osa,zma,ssp	3	NA	NaN
mir-1994	cte,cla,lgi	3	NA	NaN
mir-703	mmu,xla,eca	3	NA	NaN
MIR2119	gma,mtr,pvu	3	NA	NaN
mir-602	hsa,ptr,ppy	3	hsa-mir-602	0
MIR1509	gma,mtr,gso	3	NA	NaN
mir-606	hsa,ptr,ppy	3	hsa-mir-606	10.4167
mir-1180	hsa,eca,ppy	3	hsa-mir-1180	0
mir-623	hsa,ptr,ppy	3	hsa-mir-623	0
mir-1261	hsa,eca,ppy	3	hsa-mir-1261	0
mir-511	ptr,rno,ppy	3	NA	NaN
mir-596	hsa,ptr,ppy	3	hsa-mir-596	12.987
mir-63	cel,crm,ppc	3	NA	NaN
mir-1890	aga,aae,cqu	3	NA	NaN
mir-1677	gga,tgu,aca	3	NA	NaN
mir-1891	aga,aae,cqu	3	NA	NaN
mir-987	dme,dps,dsi	3	NA	NaN
mir-986	dme,dps,dsi	3	NA	NaN
mir-238	cel,cbr,crm	3	NA	NaN
mir-968	dme,dps,dsi	3	NA	NaN
mir-1010	dme,dps,dsi	3	NA	NaN
mir-1006	dme,dps,dsi	3	NA	NaN
mir-969	dme,dps,dsi	3	NA	NaN
mir-995	dme,dps,dsi	3	NA	NaN
mir-785	cel,cbr,crm	3	NA	NaN
mir-76	cel,cbr,crm	3	NA	NaN
mir-237	cel,cbr,crm	3	NA	NaN
mir-1002	dme,dps,dsi	3	NA	NaN
mir-959	dme,dps,dsi	3	NA	NaN
mir-958	dme,dps,dsi	3	NA	NaN
mir-1662	gga,tgu,aca	3	NA	NaN
mir-1805	gga,tgu,aca	3	NA	NaN
MIR1432	sbi,zma,ssp	3	NA	NaN
mir-3074	mmu,hsa,rno	3	hsa-mir-3074	0
mir-3065	mmu,hsa,rno	3	hsa-mir-3065	0
MIR827_3	ath,aly,csi	3	NA	NaN
mir-1343	bta,hsa,ssc	3	hsa-mir-1343	0
mir-356	cel,cbr,crm	3	NA	NaN
MIR2086	aau,amg,mtr	3	NA	NaN
mir-2944	aae,ame,tca	3	NA	NaN
MIR445	osa,sbi	2	NA	NaN
MIR475	ptc,mtr	2	NA	NaN
MIR441	osa,tae	2	NA	NaN
mir-466	mmu,gga	2	NA	NaN
mir-360	cel,cbr	2	NA	NaN
mir-540	mmu,rno	2	NA	NaN
mir-358	cel,cbr	2	NA	NaN
mir-48	cel,cbr	2	NA	NaN
mir-354	cel,cbr	2	NA	NaN
mir-353	cel,cbr	2	NA	NaN
mir-207	mmu,rno	2	NA	NaN
mir-240	cel,cbr	2	NA	NaN
mir-351	rno,mmu	2	NA	NaN
lsy-6	cel,cbr	2	NA	NaN
mir-344	rno,mmu	2	NA	NaN
mir-51	cel,cbr	2	NA	NaN
mir-341	rno,mmu	2	NA	NaN
mir-72	cel,cbr	2	NA	NaN
mir-70	cel,cbr	2	NA	NaN
mir-268	cel,cbr	2	NA	NaN
mir-251	cel,cbr	2	NA	NaN
MIR158	ath,aly	2	NA	NaN
mir-35	cel,cbr	2	NA	NaN
mir-254	cel,cbr	2	NA	NaN
mir-234	cel,cbr	2	NA	NaN
mir-428	xla,xtr	2	NA	NaN
mir-BART17	rlcv,ebv	2	NA	NaN
mir-BART20	rlcv,ebv	2	NA	NaN
MIR169_5	osa,zma	2	NA	NaN
mir-BART3	ebv,rlcv	2	NA	NaN
mir-BART1	ebv,rlcv	2	NA	NaN
mir-BART5	ebv,rlcv	2	NA	NaN
mir-BART15	rlcv,ebv	2	NA	NaN
mir-BART7	ebv,rlcv	2	NA	NaN
mir-BHRF1-1	ebv,rlcv	2	NA	NaN
mir-BHRF1-2	ebv,rlcv	2	NA	NaN
mir-BART12	ebv,rlcv	2	NA	NaN
mir-684	mmu,eca	2	NA	NaN
MIR821	osa,sbi	2	NA	NaN
mir-787	cel,cbr	2	NA	NaN
mir-255	cel,cbr	2	NA	NaN
MIR845_1	ath,aly	2	NA	NaN
mir-791	cel,cbr	2	NA	NaN
mir-359	cel,cbr	2	NA	NaN
mir-392	cel,cbr	2	NA	NaN
mir-789	cel,cbr	2	NA	NaN
MIR414	ath,ppt	2	NA	NaN
mir-465	mmu,rno	2	NA	NaN
mir-883	mmu,rno	2	NA	NaN
mir-674	mmu,rno	2	NA	NaN
mir-673	mmu,rno	2	NA	NaN
MIR950	pta,pab	2	NA	NaN
mir-343	rno,mmu	2	NA	NaN
mir-742	mmu,rno	2	NA	NaN
mir-879	mmu,rno	2	NA	NaN
mir-471	mmu,rno	2	NA	NaN
mir-463	mmu,rno	2	NA	NaN
mir-881	mmu,rno	2	NA	NaN
mir-880	mmu,rno	2	NA	NaN
mir-878	mmu,rno	2	NA	NaN
mir-327	rno,mmu	2	NA	NaN
mir-434	mmu,rno	2	NA	NaN
mir-427	xla,xtr	2	NA	NaN
MIR1120	tae,hvu	2	NA	NaN
mir-983	dme,dsi	2	NA	NaN
MIR161	ath,bna	2	NA	NaN
mir-281	cin,csa	2	NA	NaN
mir-607	hsa,mml	2	hsa-mir-607	0
mir-200	cin,csa	2	NA	NaN
mir-662	hsa,mml	2	hsa-mir-662	10.5263
mir-1473	cin,csa	2	NA	NaN
mir-92	cin,csa	2	NA	NaN
mir-625	hsa,mml	2	hsa-mir-625	11.7647
mir-644	hsa,mml	2	hsa-mir-644a	0
mir-1278	hsa,ptr	2	hsa-mir-1278	0
mir-1184	hsa,ptr	2	hsa-mir-1184-1,hsa-mir-1184-2,hsa-mir-1184-3	0
mir-1294	hsa,ptr	2	hsa-mir-1294	7.04225
mir-561	hsa,ptr	2	hsa-mir-561	10.3093
mir-1203	hsa,ptr	2	hsa-mir-1203	0
mir-1206	hsa,ptr	2	hsa-mir-1206	0
mir-B1	jcv,bkv	2	NA	NaN
mir-1272	hsa,ptr	2	hsa-mir-1272	0
mir-1276	hsa,ptr	2	hsa-mir-1276	12.0482
mir-1288	hsa,ptr	2	hsa-mir-1288	0
mir-635	hsa,ptr	2	hsa-mir-635	0
mir-1825	hsa,ptr	2	hsa-mir-1825	0
mir-1182	hsa,ptr	2	hsa-mir-1182	0
mir-641	hsa,ptr	2	hsa-mir-641	0
mir-1258	hsa,ptr	2	hsa-mir-1258	0
mir-1293	hsa,ptr	2	hsa-mir-1293	0
mir-1426	oan,gga	2	NA	NaN
mir-2001	cte,lgi	2	NA	NaN
mir-1993	cte,lgi	2	NA	NaN
mir-H3	hsv1,hsv2	2	NA	NaN
MIR1508	gma,gso	2	NA	NaN
mir-2012	sko,spu	2	NA	NaN
mir-278_2	sko,spu	2	NA	NaN
mir-2008	sko,spu	2	NA	NaN
mir-1991	hru,lgi	2	NA	NaN
mir-125_2	sja,sma	2	NA	NaN
mir-125_3	sja,sma	2	NA	NaN
mir-2011	sko,spu	2	NA	NaN
mir-1986	hru,lgi	2	NA	NaN
mir-1905	mmu,eca	2	NA	NaN
MIR1435	osa,sbi	2	NA	NaN
mir-1597	gga,eca	2	NA	NaN
mir-678	mmu,rno	2	NA	NaN
mir-1434	gga,bta	2	NA	NaN
mir-547	mmu,rno	2	NA	NaN
mir-666	mmu,rno	2	NA	NaN
mir-1898	mmu,eca	2	NA	NaN
mir-1842	cfa,eca	2	NA	NaN
mir-1902	mmu,eca	2	NA	NaN
MIR408_2	pta,aqc	2	NA	NaN
mir-667	mmu,rno	2	NA	NaN
mir-750	cte,isc	2	NA	NaN
MIR2275	osa,zma	2	NA	NaN
mir-1892	mmu,eca	2	NA	NaN
MIR1139	tae,bdi	2	NA	NaN
mir-677	mmu,bta	2	NA	NaN
mir-1729	gga,tgu	2	NA	NaN
mir-H11	hsv1,hsv2	2	NA	NaN
mir-2941	aae,cqu	2	NA	NaN
mir-982	dme,dsi	2	NA	NaN
mir-BART10	ebv,rlcv	2	NA	NaN
MIR2675	gma,mtr	2	NA	NaN
MIR827_2	ghr,tcc	2	NA	NaN
MIR398_2	zma,sbi	2	NA	NaN
mir-1270	hsa,ppy	2	hsa-mir-1270-1,hsa-mir-1270-2	0
mir-960	dme,dsi	2	NA	NaN
mir-1538	hsa,ppy	2	hsa-mir-1538	0
mir-992	dme,dsi	2	NA	NaN
mir-976	dme,dsi	2	NA	NaN
mir-1537	hsa,ppy	2	hsa-mir-1537	16.3934
mir-1003	dme,dsi	2	NA	NaN
mir-1228	hsa,ppy	2	hsa-mir-1228	0
mir-978	dme,dsi	2	NA	NaN
mir-H7	hsv1,hsv2	2	NA	NaN
mir-1923	bmo,api	2	NA	NaN
mir-977	dme,dsi	2	NA	NaN
MIR3522	gso,gma	2	NA	NaN
mir-307as	dme,dps	2	NA	NaN
mir-2355	bta,hsa	2	hsa-mir-2355	0
mir-647	hsa,ppy	2	hsa-mir-647	0
mir-59	cel,crm	2	NA	NaN
mir-1238	hsa,ppy	2	hsa-mir-1238	0
mir-1005	dme,dsi	2	NA	NaN
mir-1803	gga,tgu	2	NA	NaN
mir-1268	hsa,ppy	2	hsa-mir-1268a	19.2308
mir-BART18	ebv,rlcv	2	NA	NaN
mir-964	dme,dsi	2	NA	NaN
mir-928	ame,nvi	2	NA	NaN
mir-998	aae,cqu	2	NA	NaN
mir-2489	dme,dsi	2	NA	NaN
mir-1889	aae,cqu	2	NA	NaN
mir-BART9	ebv,rlcv	2	NA	NaN
mir-991	dme,dsi	2	NA	NaN
mir-BART14	ebv,rlcv	2	NA	NaN
mir-BART21	ebv,rlcv	2	NA	NaN
mir-2861	hsa,mmu	2	hsa-mir-2861	0
mir-1305	hsa,ppy	2	hsa-mir-1305	11.6279
mir-H5	hsv1,hsv2	2	NA	NaN
mir-1252	hsa,ppy	2	hsa-mir-1252	15.3846
mir-1011	dme,dsi	2	NA	NaN
mir-608	hsa,ppy	2	hsa-mir-608	10
mir-1909	hsa,ppy	2	hsa-mir-1909	0
mir-788	cel,crm	2	NA	NaN
mir-2494	dme,dsi	2	NA	NaN
mir-1469	hsa,ppy	2	hsa-mir-1469	0
mir-921	hsa,ppy	2	hsa-mir-921	0
mir-BART19	ebv,rlcv	2	NA	NaN
mir-1269	hsa,ppy	2	hsa-mir-1269a	9.52381
mir-1013	dme,dsi	2	NA	NaN
mir-1910	hsa,ppy	2	hsa-mir-1910	12.5
mir-955	dme,dsi	2	NA	NaN
MIR529_2	sbi,zma	2	NA	NaN
mir-BART16	ebv,rlcv	2	NA	NaN
mir-rL1-14	ebv,rlcv	2	NA	NaN
mir-1257	hsa,ppy	2	hsa-mir-1257	0
mir-784	cbr,crm	2	NA	NaN
MIR2109	gma,gso	2	NA	NaN
mir-961	dme,dsi	2	NA	NaN
mir-2765	bmo,aae	2	NA	NaN
mir-1822	cel,cbr	2	NA	NaN
mir-962	dme,dsi	2	NA	NaN
mir-303	dme,dsi	2	NA	NaN
mir-1913	hsa,ppy	2	hsa-mir-1913	12.5
mir-247	cel,crm	2	NA	NaN
mir-1260	hsa,ppy	2	hsa-mir-1260a	0
mir-1908	hsa,ppy	2	hsa-mir-1908	0
mir-2957	tgu,bta	2	NA	NaN
mir-1559	gga,tgu	2	NA	NaN
mir-2954	gga,tgu	2	NA	NaN
mir-963	dme,dsi	2	NA	NaN
mir-1200	hsa,ppy	2	hsa-mir-1200	13.1579
mir-1915	hsa,ppy	2	hsa-mir-1915	0
mir-975	dme,dsi	2	NA	NaN
mir-1914	hsa,ppy	2	hsa-mir-1914	0
mir-994	dme,dps	2	NA	NaN
mir-1012	dme,dsi	2	NA	NaN
mir-1001	dme,dsi	2	NA	NaN
mir-1451	gga,tgu	2	NA	NaN
mir-BART13	ebv,rlcv	2	NA	NaN
MIR169_8	mtr,gma	2	NA	NaN
mir-2214	cel,cbr	2	NA	NaN
mir-1304	hsa,ppy	2	hsa-mir-1304	32.967
mir-2985	tgu,rno	2	NA	NaN
mir-1471	hsa,ppy	2	hsa-mir-1471	0
mir-967	dme,dsi	2	NA	NaN
MIR774	ath,aly	2	NA	NaN
MIR773	ath,aly	2	NA	NaN
MIR841	ath,aly	2	NA	NaN
MIR4227	aly,ath	2	NA	NaN
MIR163	ath,aly	2	NA	NaN
mir-1843	mmu,cfa	2	NA	NaN
MIR2950	ghr,vvi	2	NA	NaN
MIR771	ath,aly	2	NA	NaN
MIR402	ath,aly	2	NA	NaN
MIR1887	ath,aly	2	NA	NaN
MIR852	ath,aly	2	NA	NaN
MIR3440	aly,ath	2	NA	NaN
MIR4221	aly,ath	2	NA	NaN
MIR840	ath,aly	2	NA	NaN
MIR1311	pta,pab	2	NA	NaN
MIR831	ath,aly	2	NA	NaN
MIR472	ath,aly	2	NA	NaN
MIR823	ath,aly	2	NA	NaN
MIR835	ath,aly	2	NA	NaN
MIR781	ath,aly	2	NA	NaN
MIR858	ath,aly	2	NA	NaN
mir-1949	mmu,rno	2	NA	NaN
MIR848	ath,aly	2	NA	NaN
MIR829	ath,aly	2	NA	NaN
MIR839	ath,aly	2	NA	NaN
MIR862	ath,aly	2	NA	NaN
MIR391	ath,aly	2	NA	NaN
MIR947	pta,pab	2	NA	NaN
MIR837	ath,aly	2	NA	NaN
MIR1119	tae,far	2	NA	NaN
MIR400	ath,aly	2	NA	NaN
MIR842	ath,aly	2	NA	NaN
MIR951	pta,pab	2	NA	NaN
MIR856	ath,aly	2	NA	NaN
mir-702	mmu,rno	2	NA	NaN
MIR4239	aly,ath	2	NA	NaN
mir-3578	rno,bta	2	NA	NaN
MIR869	ath,aly	2	NA	NaN
MIR851	ath,aly	2	NA	NaN
MIR4243	aly,ath	2	NA	NaN
MIR847	ath,aly	2	NA	NaN
MIR868	ath,aly	2	NA	NaN
MIR3434	aly,ath	2	NA	NaN
MIR173	ath,aly	2	NA	NaN
MIR860	ath,aly	2	NA	NaN
MIR825	ath,aly	2	NA	NaN
MIR857	ath,aly	2	NA	NaN
MIR853	ath,aly	2	NA	NaN
MIR834	ath,aly	2	NA	NaN
MIR838	ath,aly	2	NA	NaN
MIR4228	aly,ath	2	NA	NaN
MIR833	ath,aly	2	NA	NaN
mir-1188	mmu,rno	2	NA	NaN
MIR846	ath,aly	2	NA	NaN
MIR861	ath,aly	2	NA	NaN
MIR859	ath,aly	2	NA	NaN
mir-3085	mmu,rno	2	NA	NaN
MIR2112	ath,aly	2	NA	NaN
MIR844	ath,aly	2	NA	NaN
MIR4240	aly,ath	2	NA	NaN
MIR822	ath,aly	2	NA	NaN
MIR5067	hvu,bdi	2	NA	NaN
MIR1878	osa,bdi	2	NA	NaN
mir-277_2	egr,emu	2	NA	NaN
mir-3477	nvi,ame	2	NA	NaN
bpcv-mir-B1	bpcv1,bpcv2	2	NA	NaN
mir-3064	mmu,hsa	2	hsa-mir-3064	0
mir-4989	egr,emu	2	NA	NaN
mir-3572	rno,mmu	2	NA	NaN
mir-2320	bta,ssc	2	NA	NaN
mir-3529	gga,hsa	2	hsa-mir-3529	0
mir-745	egr,emu	2	NA	NaN
mir-4988	egr,emu	2	NA	NaN
mir-3960	mmu,hsa	2	hsa-mir-3960	0
MIR862_2	gma,mtr	2	NA	NaN
MIR4414	gma,mtr	2	NA	NaN
mir-729	dre,ola	2	NA	NaN
mir-1231	hsa,mmu	2	hsa-mir-1231	21.7391
MIR529_3	bcy,bgy	2	NA	NaN
mir-409	bta,rno	2	NA	NaN
mir-459	dre,ola	2	NA	NaN
mir-2970	aca,tgu	2	NA	NaN
mir-5045	gpy,tre	2	NA	NaN
mir-726	aca,dre	2	NA	NaN
mir-1549	mdo,sha	2	NA	NaN
mir-3544	mmu,rno	2	NA	NaN
mir-731	dre,ola	2	NA	NaN
mir-5105	mmu,sha	2	NA	NaN
mir-727	aca,dre	2	NA	NaN
MIR478	ptc	1	NA	NaN
MIR439	osa	1	NA	NaN
MIR481	ptc	1	NA	NaN
MIR538	ppt	1	NA	NaN
MIR476	ptc	1	NA	NaN
MIR447	ath	1	NA	NaN
MIR405	ath	1	NA	NaN
MIR537	ppt	1	NA	NaN
MIR474	ptc	1	NA	NaN
MIR480	ptc	1	NA	NaN
MIR169_3	ptc	1	NA	NaN
MIR169_4	ptc	1	NA	NaN
mir-K12-10	kshv	1	NA	NaN
mir-266	cel	1	NA	NaN
mir-64	cel	1	NA	NaN
mir-692	mmu	1	NA	NaN
mir-680	mmu	1	NA	NaN
mir-757	gga	1	NA	NaN
MIR806	osa	1	NA	NaN
MIR818	osa	1	NA	NaN
MIR812	osa	1	NA	NaN
MIR1219	ppt	1	NA	NaN
MIR811	osa	1	NA	NaN
MIR820	osa	1	NA	NaN
MIR815	osa	1	NA	NaN
MIR814	osa	1	NA	NaN
MIR807	osa	1	NA	NaN
MIR533	ppt	1	NA	NaN
MIR1220	ppt	1	NA	NaN
MIR854	ath	1	NA	NaN
MIR918	cre	1	NA	NaN
MIR902	ppt	1	NA	NaN
MIR534	ppt	1	NA	NaN
MIR898	ppt	1	NA	NaN
MIR904	ppt	1	NA	NaN
MIR1030	ppt	1	NA	NaN
MIR1063	ppt	1	NA	NaN
MIR1223	ppt	1	NA	NaN
MIR1033	ppt	1	NA	NaN
mir-941	hsa	1	hsa-mir-941-1,hsa-mir-941-2,hsa-mir-941-3,hsa-mir-941-4	25.641
MIR1023	ppt	1	NA	NaN
MIR536	ppt	1	NA	NaN
MIR1094	smo	1	NA	NaN
MIR1024	ppt	1	NA	NaN
MIR1222	ppt	1	NA	NaN
MIR1026	ppt	1	NA	NaN
MIR1027	ppt	1	NA	NaN
MIR1151	cre	1	NA	NaN
MIR1031	ppt	1	NA	NaN
MIR1082	smo	1	NA	NaN
MIR952	pta	1	NA	NaN
MIR946	pta	1	NA	NaN
MIR1144	cre	1	NA	NaN
mir-m107-1	mcmv	1	NA	NaN
mir-m22-1	mcmv	1	NA	NaN
mir-m21-1	mcmv	1	NA	NaN
MIR1446	ptc	1	NA	NaN
mir-1829	cel	1	NA	NaN
MIR1444	ptc	1	NA	NaN
MIR1095	smo	1	NA	NaN
MIR845_2	vvi	1	NA	NaN
mir-1542	mdo	1	NA	NaN
MIR810	osa	1	NA	NaN
mir-1490	odi	1	NA	NaN
mir-M7	mdv1	1	NA	NaN
MIR845_3	vvi	1	NA	NaN
mir-1421	oan	1	NA	NaN
mir-1422	oan	1	NA	NaN
MIR1861	osa	1	NA	NaN
mir-1419	oan	1	NA	NaN
MIR1882	osa	1	NA	NaN
mir-1420	oan	1	NA	NaN
MIR1428	osa	1	NA	NaN
MIR1846	osa	1	NA	NaN
MIR1862	osa	1	NA	NaN
MIR1520	gma	1	NA	NaN
MIR1919	sly	1	NA	NaN
MIR531	osa	1	NA	NaN
mir-1745	gga	1	NA	NaN
mir-1727	gga	1	NA	NaN
MIR1318	osa	1	NA	NaN
mir-1756	gga	1	NA	NaN
MIR1858	osa	1	NA	NaN
MIR1423	osa	1	NA	NaN
mir-1654	gga	1	NA	NaN
mir-1753	gga	1	NA	NaN
mir-1613	gga	1	NA	NaN
mir-1609	gga	1	NA	NaN
mir-1766	gga	1	NA	NaN
MIR1883	osa	1	NA	NaN
mir-1569	gga	1	NA	NaN
MIR1514	gma	1	NA	NaN
mir-2024	nve	1	NA	NaN
mir-683	mmu	1	NA	NaN
mir-2040	nve	1	NA	NaN
mir-258	cel	1	NA	NaN
mir-2032	nve	1	NA	NaN
mir-H1	hsv1	1	NA	NaN
mir-2043	nve	1	NA	NaN
MIR2108	gma	1	NA	NaN
mir-2284	bta	1	NA	NaN
mir-754	sme	1	NA	NaN
mir-2147	sme	1	NA	NaN
mir-753	sme	1	NA	NaN
MIR169_6	mtr	1	NA	NaN
mir-2450	bta	1	NA	NaN
MIR2121	osa	1	NA	NaN
mir-2733	bmo	1	NA	NaN
mir-2160	sme	1	NA	NaN
mir-2300	bta	1	NA	NaN
mir-2208	cel	1	NA	NaN
hvt-mir-H16	hvt	1	NA	NaN
mir-2404	bta	1	NA	NaN
MIR2912	peu	1	NA	NaN
mir-2154	sme	1	NA	NaN
hvt-mir-H9	hvt	1	NA	NaN
mir-2329	bta	1	NA	NaN
mir-2209	cel	1	NA	NaN
mir-2319	bta	1	NA	NaN
mir-2731	bmo	1	NA	NaN
mir-2384	bta	1	NA	NaN
mir-2424	bta	1	NA	NaN
mir-2363	bta	1	NA	NaN
MIR2084	ppt	1	NA	NaN
MIR2655	mtr	1	NA	NaN
MIR2630	mtr	1	NA	NaN
MIR2592	mtr	1	NA	NaN
mir-2558	dps	1	NA	NaN
mir-3003	hma	1	NA	NaN
MIR2652	mtr	1	NA	NaN
MIR2585	mtr	1	NA	NaN
mir-2241	ppc	1	NA	NaN
mir-2238	ppc	1	NA	NaN
MIR2629	mtr	1	NA	NaN
mir-2235	ppc	1	NA	NaN
mir-2807	bmo	1	NA	NaN
mir-2778	bmo	1	NA	NaN
mir-2780	bmo	1	NA	NaN
mir-2774	bmo	1	NA	NaN
MIR2659	mtr	1	NA	NaN
MIR2676	mtr	1	NA	NaN
MIR2590	mtr	1	NA	NaN
MIR2587	mtr	1	NA	NaN
mir-2808	bmo	1	NA	NaN
mir-3118	hsa	1	hsa-mir-3118-1,hsa-mir-3118-2,hsa-mir-3118-3,hsa-mir-3118-4,hsa-mir-3118-5,hsa-mir-3118-6	13.363
mir-2240	ppc	1	NA	NaN
mir-2517	dps	1	NA	NaN
mir-4003	cin	1	NA	NaN
MIR2680	mtr	1	NA	NaN
mir-1837	cfa	1	NA	NaN
mir-3130	hsa	1	hsa-mir-3130-1,hsa-mir-3130-2	26.6667
mir-3202	hsa	1	hsa-mir-3202-1,hsa-mir-3202-2	0
mir-3267	bmo	1	NA	NaN
mir-2804	bmo	1	NA	NaN
MIR2670	mtr	1	NA	NaN
mir-2543	dps	1	NA	NaN
mir-2518	dps	1	NA	NaN
MIR2907	osa	1	NA	NaN
MIR2609	mtr	1	NA	NaN
mir-4000	cin	1	NA	NaN
mir-3538	gga	1	NA	NaN
mir-2582	dsi	1	NA	NaN
mir-2904	bta	1	NA	NaN
mir-54	cbr	1	NA	NaN
MIR2593	mtr	1	NA	NaN
mir-2849	bmo	1	NA	NaN
MIR2653	mtr	1	NA	NaN
mir-2566	dps	1	NA	NaN
MIR396_2	osa	1	NA	NaN
mir-2237	ppc	1	NA	NaN
mir-2816	bmo	1	NA	NaN
mir-2833	bmo	1	NA	NaN
MIR2647	mtr	1	NA	NaN
MIR2606	mtr	1	NA	NaN
mir-2542	dps	1	NA	NaN
mir-3156	hsa	1	hsa-mir-3156-1,hsa-mir-3156-2,hsa-mir-3156-3	8.73362
MIR2679	mtr	1	NA	NaN
mir-2976	tgu	1	NA	NaN
mir-3180	hsa	1	hsa-mir-3180-1,hsa-mir-3180-2,hsa-mir-3180-3,hsa-mir-3180-4,hsa-mir-3180-5	0
MIR2615	mtr	1	NA	NaN
MIR2949	ghr	1	NA	NaN
mir-3179	hsa	1	hsa-mir-3179-1,hsa-mir-3179-2,hsa-mir-3179-3	0
mir-3470	mmu	1	NA	NaN
mir-4077	cin	1	NA	NaN
mir-2772	bmo	1	NA	NaN
MIR2617	mtr	1	NA	NaN
mir-3204	bmo	1	NA	NaN
mir-2797	bmo	1	NA	NaN
MIR2599	mtr	1	NA	NaN
mir-2253	ppc	1	NA	NaN
mir-4283	hsa	1	hsa-mir-4283-1,hsa-mir-4283-2	0
MIR2594	mtr	1	NA	NaN
mir-4017	cin	1	NA	NaN
mir-M8	mdv1	1	NA	NaN
MIR2863	osa	1	NA	NaN
mir-2686	cte	1	NA	NaN
mir-4178	cin	1	NA	NaN
MIR1863	osa	1	NA	NaN
mir-2956	tgu	1	NA	NaN
mir-2567	dps	1	NA	NaN
mir-2980	tgu	1	NA	NaN
MIR1161	cre	1	NA	NaN
mir-2242	ppc	1	NA	NaN
mir-4010	cin	1	NA	NaN
MIR2657	mtr	1	NA	NaN
mir-4015	cin	1	NA	NaN
mir-4012	cin	1	NA	NaN
mir-64_2	crm	1	NA	NaN
mir-2822	bmo	1	NA	NaN
mir-3119	hsa	1	hsa-mir-3119-1,hsa-mir-3119-2	0
MIR2656	mtr	1	NA	NaN
mir-2511	dps	1	NA	NaN
mir-2831	bmo	1	NA	NaN
mir-2513	dps	1	NA	NaN
mir-2902	bta	1	NA	NaN
MIR2871	osa	1	NA	NaN
MIR2610	mtr	1	NA	NaN
MIR2088	mtr	1	NA	NaN
mir-2545	dps	1	NA	NaN
MIR899	ppt	1	NA	NaN
MIR2624	mtr	1	NA	NaN
mir-1906	mmu	1	NA	NaN
mir-3116	hsa	1	hsa-mir-3116-1,hsa-mir-3116-2	7.04225
mir-2818	bmo	1	NA	NaN
mir-2568	dps	1	NA	NaN
MIR2644	mtr	1	NA	NaN
mir-4005	cin	1	NA	NaN
MIR2646	mtr	1	NA	NaN
mir-2222	cbr	1	NA	NaN
mir-2851	bmo	1	NA	NaN
MIR2618	mtr	1	NA	NaN
MIR2673	mtr	1	NA	NaN
mir-3012	hma	1	NA	NaN
mir-3347	bmo	1	NA	NaN
mir-2996	tgu	1	NA	NaN
mir-2979	tgu	1	NA	NaN
mir-1972	hsa	1	hsa-mir-1972-1,hsa-mir-1972-2,hsa-mir-5708	0
mir-3199	hsa	1	hsa-mir-3199-1,hsa-mir-3199-2	11.4943
mir-3160	hsa	1	hsa-mir-3160-1,hsa-mir-3160-2	0
mir-2574	dps	1	NA	NaN
MIR2588	mtr	1	NA	NaN
mir-4315	hsa	1	hsa-mir-4315-1,hsa-mir-4315-2	13.6986
mir-2820	bmo	1	NA	NaN
mir-2989	tgu	1	NA	NaN
MIR2660	mtr	1	NA	NaN
mir-2887	bta	1	NA	NaN
mir-2813	bmo	1	NA	NaN
mir-2843	bmo	1	NA	NaN
mir-2834	bmo	1	NA	NaN
mir-3604	bta	1	NA	NaN
mir-2830	bmo	1	NA	NaN
mir-3471	mmu	1	NA	NaN
mir-2232	ppc	1	NA	NaN
MIR2612	mtr	1	NA	NaN
mir-2943	aae	1	NA	NaN
mir-2528	dps	1	NA	NaN
MIR2640	mtr	1	NA	NaN
MIR1521	gma	1	NA	NaN
mir-3158	hsa	1	hsa-mir-3158-1,hsa-mir-3158-2	0
mir-2576	dps	1	NA	NaN
mir-2814	bmo	1	NA	NaN
mir-2856	bmo	1	NA	NaN
MIR2933	ath	1	NA	NaN
mir-2239	ppc	1	NA	NaN
mir-2035	nve	1	NA	NaN
MIR3454	esi	1	NA	NaN
mir-3036	api	1	NA	NaN
mir-92_2	api	1	NA	NaN
MIR3631	vvi	1	NA	NaN
mir-3150	hsa	1	hsa-mir-3150a,hsa-mir-3150b	0
mir-3017	api	1	NA	NaN
MIR4208	aly	1	NA	NaN
MIR4387	gma	1	NA	NaN
mir-3043	api	1	NA	NaN
mir-3015	api	1	NA	NaN
mir-3051	api	1	NA	NaN
MIR4380	gma	1	NA	NaN
mir-3926	hsa	1	hsa-mir-3926-1,hsa-mir-3926-2	0
mir-3045	api	1	NA	NaN
mir-3556	rno	1	NA	NaN
mir-3034	api	1	NA	NaN
mir-3913	hsa	1	hsa-mir-3913-1,hsa-mir-3913-2	0
MIR4371	gma	1	NA	NaN
mir-3689	hsa	1	hsa-mir-3689a,hsa-mir-3689b,hsa-mir-3689c,hsa-mir-3689d-1,hsa-mir-3689d-2,hsa-mir-3689e,hsa-mir-3689f	18.6441
mir-3035	api	1	NA	NaN
MIR4368	gma	1	NA	NaN
mir-3910	hsa	1	hsa-mir-3910-1,hsa-mir-3910-2	5.18135
MIR164_2	far	1	NA	NaN
MIR4343	gma	1	NA	NaN
MIR4374	gma	1	NA	NaN
MIR3709	pab	1	NA	NaN
MIR3932	ath	1	NA	NaN
MIR4364	gma	1	NA	NaN
mir-3914	hsa	1	hsa-mir-3914-1,hsa-mir-3914-2	0
mir-3070	mmu	1	NA	NaN
MIR3444	aly	1	NA	NaN
mir-3622	hsa	1	hsa-mir-3622a,hsa-mir-3622b	22.4719
MIR4359	gma	1	NA	NaN
mir-3432	bta	1	NA	NaN
MIR4378	gma	1	NA	NaN
mir-3596	rno	1	NA	NaN
mir-3047	api	1	NA	NaN
mir-3851	tca	1	NA	NaN
mir-3811	tca	1	NA	NaN
MIR2632	mtr	1	NA	NaN
mir-4872	bfl	1	NA	NaN
mir-4509	hsa	1	hsa-mir-4509-1,hsa-mir-4509-2,hsa-mir-4509-3	0
mir-2476	ssc	1	NA	NaN
mir-4776	hsa	1	hsa-mir-4776-1,hsa-mir-4776-2	0
mir-4818	sko	1	NA	NaN
mir-4817	sko	1	NA	NaN
mir-1502	cin	1	NA	NaN
mir-H2	hsv1	1	NA	NaN
mir-3524	gga	1	NA	NaN
mir-3198	hsa	1	hsa-mir-3198-1,hsa-mir-3198-2	6.25
mir-3817	tca	1	NA	NaN
mir-3135	hsa	1	hsa-mir-3135a,hsa-mir-3135b	0
mir-4435	hsa	1	hsa-mir-4435-1,hsa-mir-4435-2	0
mir-4875	bfl	1	NA	NaN
mir-3747	ame	1	NA	NaN
mir-4900	bfl	1	NA	NaN
mir-3718	ame	1	NA	NaN
MIR5020	ath	1	NA	NaN
mir-4679	hsa	1	hsa-mir-4679-1,hsa-mir-4679-2	6.57895
mir-4922	cel	1	NA	NaN
mir-3473	mmu	1	NA	NaN
mir-3836	tca	1	NA	NaN
mir-4897	bfl	1	NA	NaN
mir-4868	bfl	1	NA	NaN
mir-4650	hsa	1	hsa-mir-4650-1,hsa-mir-4650-2	0
mir-4436	hsa	1	hsa-mir-4436a,hsa-mir-4436b-1,hsa-mir-4436b-2	0
MIR5062	bdi	1	NA	NaN
MIR4349	gma	1	NA	NaN
mir-4081	cin	1	NA	NaN
mir-3155	hsa	1	hsa-mir-3155a,hsa-mir-3155b	0
mir-3096	mmu	1	NA	NaN
mir-4662	hsa	1	hsa-mir-4662a,hsa-mir-4662b	13.5135
MIR5185	bdi	1	NA	NaN
mir-H4	hsv2	1	NA	NaN
mir-4862	bfl	1	NA	NaN
mir-4885	bfl	1	NA	NaN
mir-4773	hsa	1	hsa-mir-4773-1,hsa-mir-4773-2	0
mir-3190	hsa	1	hsa-mir-3190,hsa-mir-3191	0
mir-4599	pma	1	NA	NaN
MIR2873	osa	1	NA	NaN
mir-3804	tca	1	NA	NaN
mir-4659	hsa	1	hsa-mir-4659a,hsa-mir-4659b	0
MIR4372	gma	1	NA	NaN
mir-4771	hsa	1	hsa-mir-4771-1,hsa-mir-4771-2	13.5135
mir-4018	cin	1	NA	NaN
mir-B6	bhv1	1	NA	NaN
MIR5015	ath	1	NA	NaN
mir-3688	hsa	1	hsa-mir-3688-1,hsa-mir-3688-2	11.1111
mir-4841	sko	1	NA	NaN
mir-4848	spu	1	NA	NaN
mir-4041	cin	1	NA	NaN
MIR3980	osa	1	NA	NaN
MIR2934	ath	1	NA	NaN
mir-4520	hsa	1	hsa-mir-4520a,hsa-mir-4520b	16.129
mir-4079	cin	1	NA	NaN
mir-4477	hsa	1	hsa-mir-4477a,hsa-mir-4477b	49.3827
mir-1954	mmu	1	NA	NaN
MIR5267	mtr	1	NA	NaN
MIR5284	mtr	1	NA	NaN
MIR5272	mtr	1	NA	NaN
MIR5565	sbi	1	NA	NaN
MIR5645	ath	1	NA	NaN
MIR5271	mtr	1	NA	NaN
MIR5236	mtr	1	NA	NaN
MIR5635	ath	1	NA	NaN
MIR2600	mtr	1	NA	NaN
mir-43_2	asu	1	NA	NaN
MIR5298	mtr	1	NA	NaN
MIR5295	mtr	1	NA	NaN
MIR5037	gma	1	NA	NaN
mir-2190	dre	1	NA	NaN
MIR5241	mtr	1	NA	NaN
MIR1512	gma	1	NA	NaN
MIR5285	mtr	1	NA	NaN
MIR5291	mtr	1	NA	NaN
MIR2619	mtr	1	NA	NaN
MIR4347	gma	1	NA	NaN
MIR5235	mtr	1	NA	NaN
MIR5148	osa	1	NA	NaN
mir-2185	dre	1	NA	NaN
MIR5270	mtr	1	NA	NaN
MIR5294	mtr	1	NA	NaN
MIR4998	gma	1	NA	NaN
MIR5387	sbi	1	NA	NaN
MIR4354	gma	1	NA	NaN
MIR4356	gma	1	NA	NaN
mir-4444	hsa	1	hsa-mir-4444-1,hsa-mir-4444-2	6.75676
MIR5274	mtr	1	NA	NaN
mir-5408	aca	1	NA	NaN
MIR4415	gma	1	NA	NaN
mir-5429	aca	1	NA	NaN
MIR5157	osa	1	NA	NaN
mir-5615	mmu	1	NA	NaN
mir-4536	hsa	1	hsa-mir-4536-1,hsa-mir-4536-2	0
MIR5224	mtr	1	NA	NaN
MIR5223	mtr	1	NA	NaN
MIR5229	mtr	1	NA	NaN
MIR5534	osa	1	NA	NaN
mir-5701	hsa	1	hsa-mir-5701-1,hsa-mir-5701-2	0
MIR5208	mtr	1	NA	NaN
MIR1523	gma	1	NA	NaN
MIR5292	mtr	1	NA	NaN
mir-4524	hsa	1	hsa-mir-4524a,hsa-mir-4524b	0
MIR5380	gma	1	NA	NaN
MIR5630	ath	1	NA	NaN
MIR1888	ath	1	NA	NaN
MIR4997	gma	1	NA	NaN
mir-5593	cel	1	NA	NaN
MIR5219	mtr	1	NA	NaN
mir-3680	hsa	1	hsa-mir-3680-1,hsa-mir-3680-2	0
mir-4482	hsa	1	hsa-mir-4482-1,hsa-mir-4482-2	14.2857
mir-3670	hsa	1	hsa-mir-3670-1,hsa-mir-3670-2	0
MIR5286	mtr	1	NA	NaN
mir-5681	hsa	1	hsa-mir-5681a,hsa-mir-5681b	0
mir-716	sha	1	NA	NaN
MIR5642	ath	1	NA	NaN
MIR5643	ath	1	NA	NaN
MIR5638	ath	1	NA	NaN
mir-5692	hsa	1	hsa-mir-5692c-1,hsa-mir-5692c-2,hsa-mir-5692a-1,hsa-mir-5692a-2	0
MIR167	gma	1	NA	NaN
MIR1516	gma	1	NA	NaN
mir-725	dre	1	NA	NaN
mir-5583	hsa	1	hsa-mir-5583-1,hsa-mir-5583-2	0
mir-5345	asu	1	NA	NaN
mir-5444	aca	1	NA	NaN
MIR5564	sbi	1	NA	NaN
MIR1513	gma	1	NA	NaN
MIR5216	mtr	1	NA	NaN
mir-5365	asu	1	NA	NaN
mir-5316	rmi	1	NA	NaN
MIR5268	mtr	1	NA	NaN
mir-5592	cel	1	NA	NaN
mir-5350	asu	1	NA	NaN
MIR5038	gma	1	NA	NaN
MIR5649	ath	1	NA	NaN
MIR5269	mtr	1	NA	NaN
MIR3981	osa	1	NA	NaN

## Sheet: column_names
Column_name	Detailed_column_name
MiRNA_family	The name of the miRNA family
Species	Species in which the miRNA family appeared
#Species	The number of species in which the miRNA family appeared
Human_miRNAs	Human miRNAs in the miRNA family, NA means no miRNA of this family in human
Mature_miRNA_SNP_density	The average SNP density of the human mature miRNAs in the miRNA family; NaN means the value is not available because the miRNA family has no locus in human
Note: The full name of the species.
aae: Aedes aegypti
aau: Acacia auriculiformis
aca: Anolis carolinensis
aga: Anopheles gambiae
age: Ateles geoffroyi
ahy: Arachis hypogaea
aly: Arabidopsis lyrata
ame: Apis mellifera
amg: Acacia mangium
api: Acyrthosiphon pisum
aqc: Aquilegia caerulea
aqu: Amphimedon queenslandica
asu: Ascaris suum
ata: Aegilops tauschii
ath: Arabidopsis thaliana
bcy: Bruguiera cylindrica
bdi: Brachypodium distachyon
bfl: Branchiostoma floridae
bgy: Bruguiera gymnorhiza
bhv1: Bovine herpesvirus
bkv: BK polyomavirus
bma: Brugia malayi
bmo: Bombyx mori
bna: Brassica napus
bol: Brassica oleracea
bpcv1: Bandicoot papillomatosis
bpcv2: Bandicoot papillomatosis
bra: Brassica rapa
bta: Bos taurus
cbr: Caenorhabditis briggsae
ccl: Citrus clementine
cel: Caenorhabditis elegans
cfa: Canis familiaris
cgr: Cricetulus griseus
cin: Ciona intestinalis
cla: Cerebratulus lacteus
cme: Cucumis melo
cpa: Carica papaya
cqu: Culex quinquefasciatus
cre: Chlamydomonas reinhardtii
crm: Caenorhabditis remanei
crt: Citrus reticulata
csa: Ciona savignyi
csi: Citrus sinensis
cte: Capitella teleta
ctr: Citrus trifoliata
dan: Drosophila ananassae
ddi: Dictyostelium discoideum
der: Drosophila erecta
dgr: Drosophila grimshawi
dme: Drosophila melanogaster
dmo: Drosophila mojavensis
dpe: Drosophila persimilis
dps: Drosophila pseudoobscura
dpu: Daphnia pulex
dre: Danio rerio
dse: Drosophila sechellia
dsi: Drosophila simulans
dvi: Drosophila virilis
dwi: Drosophila willistoni
dya: Drosophila yakuba
ebv: Epstein Barr
eca: Equus caballus
egr: Echinococcus granulosus
emu: Echinococcus multilocularis
esi: Ectocarpus siliculosus
far: Festuca arundinacea
fru: Fugu rubripes
gar: Gossypium arboreum
gga: Gallus gallus
ggo: Gorilla gorilla
ghb: Gossypium herbaceum
ghr: Gossypium hirsutum
gma: Glycine max
gpy: Glottidia pyramidata
gra: Gossypium raimondii
gso: Glycine soja
hbv: Herpes B
hcmv: Human cytomegalovirus
hiv1: Human immunodeficiency
hma: Hydra magnipapillata
hme: Heliconius melpomene
hru: Haliotis rufescens
hsa: Homo sapiens
hsa: MI0003657 Homo
hsv1: Herpes Simplex
hsv2: Herpes Simplex
hvsa: Herpesvirus saimiri
hvt: Herpesvirus of
hvu: Hordeum vulgare
iltv: Infectious laryngotracheitis
isc: Ixodes scapularis
jcv: JC polyomavirus
kshv: Kaposi sarcoma-associated
lca: Lemur catta
lgi: Lottia gigantea
lja: Lotus japonicus
lla: Lagothrix lagotricha
lmi: Locusta migratoria
mcmv: Mouse cytomegalovirus
mcv: Merkel cell
mdm: Malus domestica
mdo: Monodelphis domestica
mdv1: Mareks disease
mdv2: Mareks disease
meu: Macropus eugenii
mghv: Mouse gammaherpesvirus
mml: Macaca mulatta
mmu: Mus musculus
mne: Macaca nemestrina
mtr: Medicago truncatula
ngi: Nasonia giraulti
nlo: Nasonia longicornis
nve: Nematostella vectensis
nvi: Nasonia vitripennis
oan: Ornithorhynchus anatinus
oar: Ovis aries
odi: Oikopleura dioica
ola: Oryzias latipes
osa: Oryza sativa
pab: Picea abies
pbi: Pygathrix bieti
peu: Populus euphratica
pma: Petromyzon marinus
ppa: Pan paniscus
ppc: Pristionchus pacificus
ppt: Physcomitrella patens
ppy: Pongo pygmaeus
pta: Pinus taeda
ptc: Populus trichocarpa
pti: Phaeodactylum tricornutum
ptr: Pan troglodytes
pvu: Phaseolus vulgaris
rco: Ricinus communis
rgl: Rehmannia glutinosa
rlcv: Rhesus lymphocryptovirus
rmi: Rhipicephalus microplus
rno: Rattus norvegicus
rrv: Rhesus monkey
sbi: Sorghum bicolor
sha: Sarcophilus harrisii
sja: Schistosoma japonicum
sko: Saccoglossus kowalevskii
sla: Saguinus labiatus
sly: Solanum lycopersicum
sma: Schistosoma mansoni
sme: Schmidtea mediterranea
smo: Selaginella moellendorffii
smr: Strigamia maritima
sof: Saccharum officinarum
spu: Strongylocentrotus purpuratus
ssc: Sus scrofa
ssl: Salvia sclarea
ssp: Saccharum ssp.
ssy: Symphalangus syndactylus
sv40: Simian virus
tae: Triticum aestivum
tca: Tribolium castaneum
tcc: Theobroma cacao
tgu: Taeniopygia guttata
tni: Tetraodon nigroviridis
tre: Terebratulina retusa
ttu: Triticum turgidum
vun: Vigna unguiculata
vvi: Vitis vinifera
xbo: Xenoturbella bocki
xla: Xenopus laevis
xtr: Xenopus tropicalis
zma: Zea mays
